# Supplementary material
Source: PubMed Central journal article supplement (PMC3422428)
Supplement: NIHMS393775-supplement-4.pdf [file NIHMS393775-supplement-4.pdf]

# MASCOT SCIENCE Mascot Search Results

## Protein View

Match to: **IPI00625217** Score: **1095**  
**Tax\_Id=10090 Gene\_Symbol=Pax3 Paired box protein Pax-3**  
 Found in search of o63\_l1jan24\_09\_uc\_90min\_neuloss\_ms3\_pax3\_20ul.mgf

Nominal mass (M<sub>r</sub>): **53315**; Calculated pI value: **8.92**  
 NCBI BLAST search of [IPI00625217](#) against nr  
 Unformatted [sequence string](#) for pasting into other applications

Fixed modifications: Carbamidomethyl (C)  
 Variable modifications: Formyl (N-term), Oxidation (M), Phospho (ST)  
 Cleavage by Trypsin: cuts C-term side of KR unless next residue is P  
 Sequence Coverage: **38%**

Matched peptides shown in **Bold Red**

1 MTLTAGAVPR MMRPGGQNY PRSGFPLEVS TPLGQGRV**NO LGGVFINGRP**  
 51 **LPNHIRHKIV EMAHHGIRPC VISRQLRVSH** GCVSKILCRY **QETGSIRPGA**  
 101 **IGGSKPKQVT TPDVEKKIEE YKRENPGMFS WEIRDKLLKD** AVCDRNTVPS  
 151 **VSSISRILRS KFGKGEIEEA DLERKEAEE** EKKAKHSIDG **ILSERASAPQ**  
 201 **SDEGSDIDSE PDLPLKRKQR** **RSRTTFTAEO LEELEAFER** **THYPDIYTR**  
 251 ELAQRALTE **ARVQVWFSNR RARWRKQAGA** NQLMAFNHLI PGGFPTAMP  
 301 TLPTYQLSET SYQPTSIPQA VSDPSSTVHR PQPLPPSTVH QSTIPSNADS  
 351 SSAYCLPSTR HGFSSYTDSE VPPSGPSNPM NPTIGNGLSP QVMGLLTNHG  
 401 GVPHQPTDY ALSPLTGGLE PTTTVSASCS QRLEHMKNVD SLPTSQPYCP  
 451 PTYSTAGYSM DPVTGYQYGO YGQSKPWT

Show predicted peptides also

Sort Peptides By  Residue Number  Increasing Mass  Decreasing Mass

| Start - End | Observed  | Mr (expt) | Mr (calc) | ppm | Miss | Sequence                                                                         |
|-------------|-----------|-----------|-----------|-----|------|----------------------------------------------------------------------------------|
| 38 - 56     | 526.0518  | 2100.1782 | 2100.1705 | 4   | 0    | R.VNQLGGVFINGRPLPNHIR.H ( <a href="#">Ions score 34</a> )                        |
| 38 - 56     | 701.0683  | 2100.1831 | 2100.1705 | 6   | 0    | R.VNQLGGVFINGRPLPNHIR.H ( <a href="#">Ions score 55</a> )                        |
| 38 - 56     | 1051.1011 | 2100.1876 | 2100.1705 | 8   | 0    | R.VNQLGGVFINGRPLPNHIR.H ( <a href="#">Ions score 16</a> )                        |
| 38 - 56     | 526.2966  | 2101.1572 | 2100.1705 | 470 | 0    | R.VNQLGGVFINGRPLPNHIR.H ( <a href="#">Ions score 16</a> )                        |
| 38 - 56     | 526.2967  | 2101.1577 | 2100.1705 | 470 | 0    | R.VNQLGGVFINGRPLPNHIR.H ( <a href="#">Ions score 18</a> )                        |
| 38 - 56     | 526.2977  | 2101.1616 | 2100.1705 | 472 | 0    | R.VNQLGGVFINGRPLPNHIR.H ( <a href="#">Ions score 36</a> )                        |
| 38 - 56     | 701.3964  | 2101.1674 | 2100.1705 | 475 | 0    | R.VNQLGGVFINGRPLPNHIR.H ( <a href="#">Ions score 56</a> )                        |
| 38 - 56     | 1051.5922 | 2101.1698 | 2100.1705 | 476 | 0    | R.VNQLGGVFINGRPLPNHIR.H ( <a href="#">Ions score 3</a> )                         |
| 38 - 56     | 526.5427  | 2102.1416 | 2100.1705 | 939 | 0    | R.VNQLGGVFINGRPLPNHIR.H ( <a href="#">Ions score 26</a> )                        |
| 38 - 56     | 710.4016  | 2128.1830 | 2128.1654 | 8   | 0    | R.VNQLGGVFINGRPLPNHIR.H Formyl (N-term) ( <a href="#">Ions score 10</a> )        |
| 59 - 74     | 473.4999  | 1889.9704 | 1889.9716 | -1  | 0    | K.IVEMAHHGIRPCVISR.Q Oxidation (M) ( <a href="#">Ions score 10</a> )             |
| 59 - 74     | 945.9937  | 1889.9729 | 1889.9716 | 1   | 0    | K.IVEMAHHGIRPCVISR.Q Oxidation (M) ( <a href="#">Ions score 15</a> )             |
| 59 - 74     | 630.9988  | 1889.9747 | 1889.9716 | 2   | 0    | K.IVEMAHHGIRPCVISR.Q Oxidation (M) ( <a href="#">Ions score 23</a> )             |
| 90 - 107    | 462.2505  | 1844.9731 | 1844.9744 | -1  | 0    | R.YQETGSIRPGAIGGSKPK.Q ( <a href="#">Ions score 24</a> )                         |
| 90 - 107    | 615.9984  | 1844.9734 | 1844.9744 | -1  | 0    | R.YQETGSIRPGAIGGSKPK.Q ( <a href="#">Ions score 53</a> )                         |
| 90 - 107    | 923.4977  | 1844.9808 | 1844.9744 | 3   | 0    | R.YQETGSIRPGAIGGSKPK.Q ( <a href="#">Ions score 41</a> )                         |
| 90 - 107    | 625.3336  | 1872.9790 | 1872.9694 | 5   | 0    | R.YQETGSIRPGAIGGSKPK.Q Formyl (N-term) ( <a href="#">Ions score 24</a> )         |
| 108 - 116   | 508.7664  | 1015.5183 | 1015.5186 | -0  | 0    | K.QVTTDPVEK.K ( <a href="#">Ions score 14</a> )                                  |
| 108 - 116   | 508.7667  | 1015.5188 | 1015.5186 | 0   | 0    | K.QVTTDPVEK.K ( <a href="#">Ions score 20</a> )                                  |
| 108 - 116   | 1044.5264 | 1043.5191 | 1043.5135 | 5   | 0    | K.QVTTDPVEK.K Formyl (N-term) ( <a href="#">Ions score 24</a> )                  |
| 108 - 117   | 572.8140  | 1143.6135 | 1143.6136 | -0  | 1    | K.QVTTDPVEKK.I ( <a href="#">Ions score 39</a> )                                 |
| 108 - 117   | 382.2119  | 1143.6138 | 1143.6136 | 0   | 1    | K.QVTTDPVEKK.I ( <a href="#">Ions score 36</a> )                                 |
| 117 - 122   | 405.2238  | 808.4331  | 808.4330  | 0   | 1    | K.KIEEYK.R ( <a href="#">Ions score 31</a> )                                     |
| 117 - 122   | 809.4408  | 808.4335  | 808.4330  | 1   | 1    | K.KIEEYK.R ( <a href="#">Ions score 1</a> )                                      |
| 118 - 123   | 419.2268  | 836.4391  | 836.4392  | -0  | 1    | K.IEEYKR.E ( <a href="#">Ions score 31</a> )                                     |
| 118 - 123   | 419.2271  | 836.4397  | 836.4392  | 1   | 1    | K.IEEYKR.E ( <a href="#">Ions score 12</a> )                                     |
| 118 - 123   | 419.2272  | 836.4399  | 836.4392  | 1   | 1    | K.IEEYKR.E ( <a href="#">Ions score 14</a> )                                     |
| 118 - 123   | 419.2272  | 836.4399  | 836.4392  | 1   | 1    | K.IEEYKR.E ( <a href="#">Ions score 21</a> )                                     |
| 118 - 123   | 837.4491  | 836.4418  | 836.4392  | 3   | 1    | K.IEEYKR.E ( <a href="#">Ions score 14</a> )                                     |
| 123 - 134   | 513.2481  | 1536.7225 | 1536.7143 | 5   | 1    | K.RENPGMFSWEIR.D Oxidation (M) ( <a href="#">Ions score 63</a> )                 |
| 124 - 134   | 683.3176  | 1364.6206 | 1364.6183 | 2   | 0    | R.ENPGMFSWEIR.D ( <a href="#">Ions score 43</a> )                                |
| 124 - 134   | 691.3163  | 1380.6180 | 1380.6132 | 3   | 0    | R.ENPGMFSWEIR.D Oxidation (M) ( <a href="#">Ions score 45</a> )                  |
| 124 - 134   | 691.3170  | 1380.6195 | 1380.6132 | 5   | 0    | R.ENPGMFSWEIR.D Oxidation (M) ( <a href="#">Ions score 21</a> )                  |
| 124 - 134   | 1381.6305 | 1380.6232 | 1380.6132 | 7   | 0    | R.ENPGMFSWEIR.D Oxidation (M) ( <a href="#">Ions score 26</a> )                  |
| 124 - 134   | 705.3135  | 1408.6124 | 1408.6081 | 3   | 0    | R.ENPGMFSWEIR.D Formyl (N-term); Oxidation (M) ( <a href="#">Ions score 21</a> ) |
| 124 - 136   | 542.2507  | 1623.7304 | 1623.7351 | -3  | 1    | R.ENPGMFSWEIRDK.L Oxidation (M) ( <a href="#">Ions score 13</a> )                |
| 124 - 136   | 812.8759  | 1623.7372 | 1623.7351 | 1   | 1    | R.ENPGMFSWEIRDK.L Oxidation (M) ( <a href="#">Ions score 43</a> )                |
| 137 - 145   | 545.2861  | 1088.5577 | 1088.5648 | -7  | 1    | K.LLKDAVCDR.N ( <a href="#">Ions score 16</a> )                                  |
| 137 - 145   | 545.2886  | 1088.5626 | 1088.5648 | -2  | 1    | K.LLKDAVCDR.N ( <a href="#">Ions score 48</a> )                                  |
| 146 - 156   | 573.8104  | 1145.6063 | 1145.6040 | 2   | 0    | R.NTVPSVSSISR.I ( <a href="#">Ions score 36</a> )                                |
| 146 - 156   | 573.8118  | 1145.6090 | 1145.6040 | 4   | 0    | R.NTVPSVSSISR.I ( <a href="#">Ions score 8</a> )                                 |
| 146 - 156   | 1146.6191 | 1145.6119 | 1145.6040 | 7   | 0    | R.NTVPSVSSISR.I ( <a href="#">Ions score 4</a> )                                 |
| 146 - 156   | 1147.6035 | 1146.5962 | 1145.6040 | 866 | 0    | R.NTVPSVSSISR.I ( <a href="#">Ions score 23</a> )                                |

|           |           |           |           |     |   |                            |                          |                                   |
|-----------|-----------|-----------|-----------|-----|---|----------------------------|--------------------------|-----------------------------------|
| 146 - 156 | 587.8076  | 1173.6007 | 1173.5990 | 1   | 0 | R.NTVPSVSSISR.I            | Formyl (N-term)          | ( <a href="#">Ions score 32</a> ) |
| 146 - 156 | 587.8085  | 1173.6025 | 1173.5990 | 3   | 0 | R.NTVPSVSSISR.I            | Formyl (N-term)          | ( <a href="#">Ions score 40</a> ) |
| 146 - 156 | 1174.6100 | 1173.6027 | 1173.5990 | 3   | 0 | R.NTVPSVSSISR.I            | Formyl (N-term)          | ( <a href="#">Ions score 5</a> )  |
| 146 - 156 | 1174.6113 | 1173.6041 | 1173.5990 | 4   | 0 | R.NTVPSVSSISR.I            | Formyl (N-term)          | ( <a href="#">Ions score 12</a> ) |
| 146 - 156 | 587.8098  | 1173.6050 | 1173.5990 | 5   | 0 | R.NTVPSVSSISR.I            | Formyl (N-term)          | ( <a href="#">Ions score 11</a> ) |
| 162 - 174 | 503.5661  | 1507.6766 | 1507.6790 | -2  | 1 | K.FGKGEEEEADLER.K          |                          | ( <a href="#">Ions score 59</a> ) |
| 162 - 174 | 503.5668  | 1507.6785 | 1507.6790 | -0  | 1 | K.FGKGEEEEADLER.K          |                          | ( <a href="#">Ions score 38</a> ) |
| 162 - 174 | 754.8476  | 1507.6806 | 1507.6790 | 1   | 1 | K.FGKGEEEEADLER.K          |                          | ( <a href="#">Ions score 81</a> ) |
| 162 - 174 | 768.8466  | 1535.6787 | 1535.6740 | 3   | 1 | K.FGKGEEEEADLER.K          | Formyl (N-term)          | ( <a href="#">Ions score 61</a> ) |
| 165 - 174 | 588.7541  | 1175.4936 | 1175.4942 | -0  | 0 | K.GEEEEADLER.K             |                          | ( <a href="#">Ions score 16</a> ) |
| 165 - 174 | 588.7548  | 1175.4951 | 1175.4942 | 1   | 0 | K.GEEEEADLER.K             |                          | ( <a href="#">Ions score 63</a> ) |
| 165 - 174 | 588.7551  | 1175.4956 | 1175.4942 | 1   | 0 | K.GEEEEADLER.K             |                          | ( <a href="#">Ions score 59</a> ) |
| 165 - 174 | 1176.5059 | 1175.4986 | 1175.4942 | 4   | 0 | K.GEEEEADLER.K             |                          | ( <a href="#">Ions score 46</a> ) |
| 165 - 174 | 602.7515  | 1203.4884 | 1203.4891 | -1  | 0 | K.GEEEEADLER.K             | Formyl (N-term)          | ( <a href="#">Ions score 36</a> ) |
| 165 - 175 | 435.5363  | 1303.5869 | 1303.5891 | -2  | 1 | K.GEEEEADLERK.E            |                          | ( <a href="#">Ions score 38</a> ) |
| 165 - 175 | 652.8019  | 1303.5892 | 1303.5891 | 0   | 1 | K.GEEEEADLERK.E            |                          | ( <a href="#">Ions score 39</a> ) |
| 165 - 175 | 652.8030  | 1303.5915 | 1303.5891 | 2   | 1 | K.GEEEEADLERK.E            |                          | ( <a href="#">Ions score 50</a> ) |
| 165 - 175 | 666.8007  | 1331.5869 | 1331.5841 | 2   | 1 | K.GEEEEADLERK.E            | Formyl (N-term)          | ( <a href="#">Ions score 51</a> ) |
| 184 - 195 | 663.3626  | 1324.7107 | 1324.7099 | 1   | 1 | K.AKHSIDGILSER.A           |                          | ( <a href="#">Ions score 28</a> ) |
| 184 - 195 | 663.3635  | 1324.7125 | 1324.7099 | 2   | 1 | K.AKHSIDGILSER.A           |                          | ( <a href="#">Ions score 48</a> ) |
| 186 - 195 | 563.7959  | 1125.5772 | 1125.5778 | -1  | 0 | K.HSIDGILSER.A             |                          | ( <a href="#">Ions score 54</a> ) |
| 186 - 195 | 563.7968  | 1125.5791 | 1125.5778 | 1   | 0 | K.HSIDGILSER.A             |                          | ( <a href="#">Ions score 60</a> ) |
| 186 - 195 | 1126.5876 | 1125.5804 | 1125.5778 | 2   | 0 | K.HSIDGILSER.A             |                          | ( <a href="#">Ions score 40</a> ) |
| 186 - 195 | 563.8016  | 1125.5887 | 1125.5778 | 10  | 0 | K.HSIDGILSER.A             |                          | ( <a href="#">Ions score 33</a> ) |
| 186 - 195 | 577.7946  | 1153.5746 | 1153.5727 | 2   | 0 | K.HSIDGILSER.A             | Formyl (N-term)          | ( <a href="#">Ions score 16</a> ) |
| 186 - 195 | 1154.5898 | 1153.5826 | 1153.5727 | 9   | 0 | K.HSIDGILSER.A             | Formyl (N-term)          | ( <a href="#">Ions score 18</a> ) |
| 186 - 195 | 577.7986  | 1153.5826 | 1153.5727 | 9   | 0 | K.HSIDGILSER.A             | Formyl (N-term)          | ( <a href="#">Ions score 5</a> )  |
| 196 - 216 | 724.3375  | 2169.9907 | 2169.9913 | -0  | 0 | R.ASAPQSDEGSDIDSEPDPLPK.R  |                          | ( <a href="#">Ions score 80</a> ) |
| 196 - 216 | 1086.0042 | 2169.9937 | 2169.9913 | 1   | 0 | R.ASAPQSDEGSDIDSEPDPLPK.R  |                          | ( <a href="#">Ions score 96</a> ) |
| 196 - 216 | 1086.0087 | 2170.0028 | 2169.9913 | 5   | 0 | R.ASAPQSDEGSDIDSEPDPLPK.R  |                          | ( <a href="#">Ions score 69</a> ) |
| 196 - 216 | 1100.0023 | 2197.9901 | 2197.9863 | 2   | 0 | R.ASAPQSDEGSDIDSEPDPLPK.R  | Formyl (N-term)          | ( <a href="#">Ions score 5</a> )  |
| 196 - 216 | 733.6710  | 2197.9912 | 2197.9863 | 2   | 0 | R.ASAPQSDEGSDIDSEPDPLPK.R  | Formyl (N-term)          | ( <a href="#">Ions score 5</a> )  |
| 196 - 216 | 733.6724  | 2197.9953 | 2197.9863 | 4   | 0 | R.ASAPQSDEGSDIDSEPDPLPK.R  | Formyl (N-term)          | ( <a href="#">Ions score 5</a> )  |
| 196 - 216 | 1100.0057 | 2197.9969 | 2197.9863 | 5   | 0 | R.ASAPQSDEGSDIDSEPDPLPK.R  | Formyl (N-term)          | ( <a href="#">Ions score 5</a> )  |
| 196 - 216 | 760.9847  | 2279.9322 | 2277.9526 | 869 | 0 | R.ASAPQSDEGSDIDSEPDPLPK.R  | Formyl (N-term); Phospho |                                   |
| 196 - 217 | 1164.0549 | 2326.0953 | 2326.0924 | 1   | 1 | R.ASAPQSDEGSDIDSEPDPLPKR.K |                          | ( <a href="#">Ions score 70</a> ) |
| 196 - 217 | 776.3733  | 2326.0980 | 2326.0924 | 2   | 1 | R.ASAPQSDEGSDIDSEPDPLPKR.K |                          | ( <a href="#">Ions score 72</a> ) |
| 196 - 217 | 776.3734  | 2326.0984 | 2326.0924 | 3   | 1 | R.ASAPQSDEGSDIDSEPDPLPKR.K |                          | ( <a href="#">Ions score 94</a> ) |
| 196 - 217 | 785.7041  | 2354.0905 | 2354.0874 | 1   | 1 | R.ASAPQSDEGSDIDSEPDPLPKR.K | Formyl (N-term)          | ( <a href="#">Ions score 5</a> )  |
| 196 - 217 | 1178.0544 | 2354.0943 | 2354.0874 | 1   | 1 | R.ASAPQSDEGSDIDSEPDPLPKR.K | Formyl (N-term)          | ( <a href="#">Ions score 5</a> )  |
| 196 - 217 | 785.7065  | 2354.0978 | 2354.0874 | 4   | 1 | R.ASAPQSDEGSDIDSEPDPLPKR.K | Formyl (N-term)          | ( <a href="#">Ions score 5</a> )  |
| 222 - 236 | 603.9714  | 1808.8925 | 1808.8904 | 1   | 1 | R.SRTTFTAEQLEELER.A        |                          | ( <a href="#">Ions score 48</a> ) |
| 224 - 236 | 1566.7635 | 1565.7563 | 1565.7573 | -1  | 0 | R.TTFTAEQLEELER.A          |                          | ( <a href="#">Ions score 21</a> ) |
| 224 - 236 | 783.8881  | 1565.7617 | 1565.7573 | 3   | 0 | R.TTFTAEQLEELER.A          |                          | ( <a href="#">Ions score 74</a> ) |
| 224 - 236 | 783.8886  | 1565.7625 | 1565.7573 | 3   | 0 | R.TTFTAEQLEELER.A          |                          | ( <a href="#">Ions score 65</a> ) |
| 224 - 236 | 783.8904  | 1565.7662 | 1565.7573 | 6   | 0 | R.TTFTAEQLEELER.A          |                          | ( <a href="#">Ions score 47</a> ) |
| 224 - 236 | 783.8922  | 1565.7697 | 1565.7573 | 8   | 0 | R.TTFTAEQLEELER.A          |                          | ( <a href="#">Ions score 45</a> ) |
| 224 - 236 | 797.8843  | 1593.7541 | 1593.7522 | 1   | 0 | R.TTFTAEQLEELER.A          | Formyl (N-term)          | ( <a href="#">Ions score 41</a> ) |
| 224 - 236 | 797.8857  | 1593.7569 | 1593.7522 | 3   | 0 | R.TTFTAEQLEELER.A          | Formyl (N-term)          | ( <a href="#">Ions score 70</a> ) |
| 224 - 236 | 797.8894  | 1593.7643 | 1593.7522 | 8   | 0 | R.TTFTAEQLEELER.A          | Formyl (N-term)          | ( <a href="#">Ions score 35</a> ) |
| 241 - 249 | 389.1922  | 1164.5548 | 1164.5564 | -1  | 0 | R.THYPDIYTR.E              |                          | ( <a href="#">Ions score 30</a> ) |
| 241 - 249 | 583.2853  | 1164.5560 | 1164.5564 | -0  | 0 | R.THYPDIYTR.E              |                          | ( <a href="#">Ions score 26</a> ) |
| 241 - 249 | 389.1928  | 1164.5565 | 1164.5564 | 0   | 0 | R.THYPDIYTR.E              |                          | ( <a href="#">Ions score 17</a> ) |
| 241 - 249 | 583.2869  | 1164.5592 | 1164.5564 | 2   | 0 | R.THYPDIYTR.E              |                          | ( <a href="#">Ions score 12</a> ) |
| 241 - 249 | 1165.5692 | 1164.5619 | 1164.5564 | 5   | 0 | R.THYPDIYTR.E              |                          | ( <a href="#">Ions score 19</a> ) |
| 241 - 249 | 597.2846  | 1192.5547 | 1192.5513 | 3   | 0 | R.THYPDIYTR.E              | Formyl (N-term)          | ( <a href="#">Ions score 13</a> ) |
| 263 - 270 | 518.2718  | 1034.5290 | 1034.5298 | -1  | 0 | R.VQVWFSNR.R               |                          | ( <a href="#">Ions score 9</a> )  |
| 263 - 270 | 518.2729  | 1034.5312 | 1034.5298 | 1   | 0 | R.VQVWFSNR.R               |                          | ( <a href="#">Ions score 29</a> ) |
| 263 - 270 | 1035.5398 | 1034.5325 | 1034.5298 | 3   | 0 | R.VQVWFSNR.R               |                          | ( <a href="#">Ions score 9</a> )  |
| 263 - 271 | 397.8840  | 1190.6303 | 1190.6309 | -1  | 1 | R.VQVWFSNRR.A              |                          | ( <a href="#">Ions score 14</a> ) |
| 263 - 271 | 398.2126  | 1191.6159 | 1190.6309 | 827 | 1 | R.VQVWFSNRR.A              |                          | ( <a href="#">Ions score 16</a> ) |

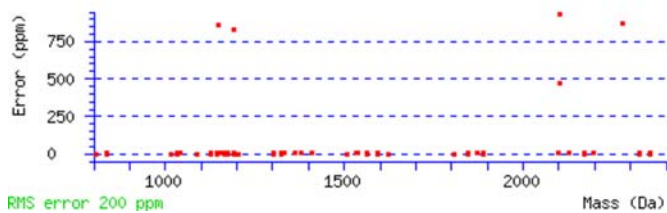

ID IPI00625217.1 IPI; PRT; 479 AA.  
 AC IPI00625217;  
 DT 30-JUL-2005 (IPI Mouse rel. 3.09, Created)  
 DT 30-JUL-2005 (IPI Mouse rel. 3.09, Last sequence update)  
 DE PAIRED BOX PROTEIN PAX-3.  
 OS Mus musculus (Mouse).  
 OC Eukaryota; Metazoa; Chordata; Craniata; Vertebrata; Euteleostomi;  
 OC Mammalia; Eutheria; Rodentia; Sciurognathi; Muridae; Murinae; Mus.

OX NCBI\_TaxID=10090;  
 CC -!- GENE\_LOCATION: Chr. 1:78097842-78193711:-1.  
 DR UniProtKB/Swiss-Prot; P24610; PAX3\_MOUSE; M.  
 DR REFSEQ\_VALIDATED; NP\_032807; GI:226958472; -.  
 DR ENSEMBL; ENSMUSP00000084320; ENSMUSG00000004872; -.  
 DR UniParc; UPI00000E891C; -; -.  
 DR MGI; MGI:97487; Pax3; -.  
 DR Entrez Gene; 18505; Pax3; -.  
 DR UniGene; Mm.1371; -; -.  
 DR UniGene; Mm.478746; -; -.  
 DR CCDS; CCDS15082.1; -; -.  
 DR trome; MTR044593; -; PRT.  
 DR Transfac; T00680; -; -.  
 DR CleanEx; MM\_PAX3; -; -.  
 DR InterPro; IPR001356; Homeobox.  
 DR InterPro; IPR017970; Homeobox\_CS.  
 DR InterPro; IPR009057; Homeodomain-like.  
 DR InterPro; IPR012287; Homeodomain-rel.  
 DR InterPro; IPR001523; Paired\_box\_N.  
 DR InterPro; IPR022106; Pax7.  
 DR InterPro; IPR011991; WHTH\_trsnscrt\_rep\_DNA-bd.  
 DR Pfam; PF00046; Homeobox; 1.  
 DR Pfam; PF00292; PAX; 1.  
 DR Pfam; PF12360; Pax7; 1.  
 DR PRINTS; PR00027; PAIREDBOX.  
 DR SMART; SM00389; HOX; 1.  
 DR SMART; SM00351; PAX; 1.  
 DR PROSITE; PS00027; HOMEBOX\_1; 1.  
 DR PROSITE; PS50071; HOMEBOX\_2; 1.  
 DR PROSITE; PS00034; PAIRED\_1; 1.  
 DR PROSITE; PS51057; PAIRED\_2; 1.  
 DR SUPERFAMILY; SSF46689; Homeodomain\_like; 2.  
 DR GENE3D; G3DSA:1.10.10.10; Wing\_hlx\_DNA\_bd; 2.  
 DR GENE3D; G3DSA:1.10.10.60; Homeodomain-rel; 1.  
 SQ SEQUENCE 479 AA; 52949 MW; 8806E551FFB755A0 CRC64;  
 MTTLAGAVPR MMRPGPGQNY PRSGFPLEVS TPLGQGRVNO LGGVFINGRP LPNHIRHKIV  
 EMAHHGIRPC VISRQLRVSH GCVSKILCRY QETGSIRPGA IGGSKPKQVT TPDVEKKIEE  
 YKRENPGMFS WEIRDKLLKD AVCDRNTVPS VSSISRILRS KFGKGEEEEE DLERKEAEES  
 EKKAKHSIDG ILSERASAPQ SDEGSDIDSE PDLPLKRKQR RSRTTFTAEQ LEELERAFER  
 THYPDIYTRE ELAQRAKLTE ARVQVWFSNR RARWRKQAGA NQLMAFNHLI PGGFPPTAMP  
 TLPTYQLSET SYQPTSIPQA VSDPSSTVHR PQPLPPSTVH QSTIPSNADS SSAYCLPSTR  
 HGFSSYTDSE VPPSGPSNPM NPTIGNLSP QVMGLLTNHG GVPHQPQTDY ALSPLTGGLE  
 PTTTVSASCS QRLEHMKNDV SLPTSQPYCP PTYSTAGYSM DPVTGYQYQG YGQSKPWTF

Mascot: <http://www.matrixscience.com/>

**MATRIX SCIENCE Mascot Search Results**

**Peptide View**

MS/MS Fragmentation of **ASAPQSDEGSDIDSEPDLPK**

Found in **IP100625217**, Tax\_Id=10090 Gene\_Symbol=Pax3 Paired box protein Pax-3

Match to Query 7456: 2279.932212 from(760.984680,3+) intensity(169254.0000) index(2551)

Title: o63\_11jan24\_09\_uc\_90min\_neuloss\_ms3\_pax3\_20ul.03846.03846.3

Data file o63\_11jan24\_09\_uc\_90min\_neuloss\_ms3\_pax3\_20ul.mgf

Click mouse within plot area to zoom in by factor of two about that point

Or, Plot from 200 to 2000 Da Full range

Label all possible matches Label matches used for scoring

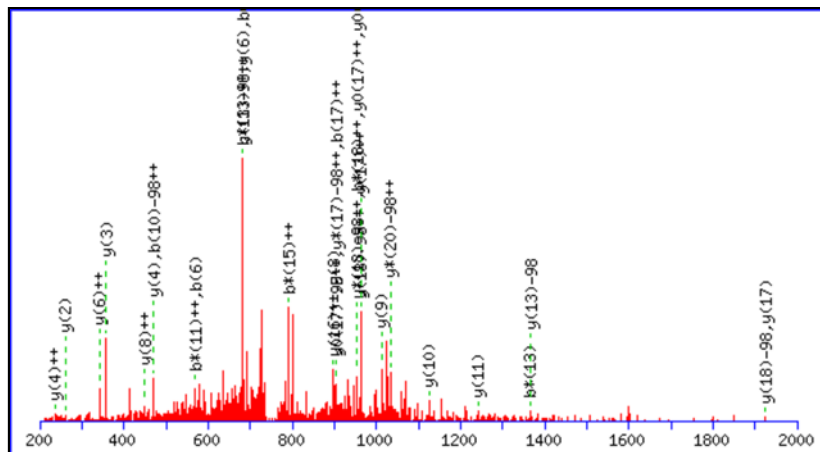

Monoisotopic mass of neutral peptide Mr(calc): 2277.9526

Fixed modifications: Carbamidomethyl (C) (apply to specified residues or termini only)

Variable modifications:

N-term : Formyl (N-term)

S10 : Phospho (ST), with neutral losses 97.9769(shown in table), 0.0000

Ions Score: 34 Expect: 0.077

Matches : 34/342 fragment ions using 52 most intense peaks (help)

| #  | b         | b <sup>++</sup> | b <sup>*</sup> | b <sup>*++</sup> | b <sup>0</sup> | b <sup>0++</sup> | Seq. | y         | y <sup>++</sup> | y <sup>*</sup> | y <sup>*++</sup> | y <sup>0</sup> | y <sup>0++</sup> | #  |
|----|-----------|-----------------|----------------|------------------|----------------|------------------|------|-----------|-----------------|----------------|------------------|----------------|------------------|----|
| 1  | 100.0393  | 50.5233         |                |                  |                |                  | A    |           |                 |                |                  |                |                  | 21 |
| 2  | 187.0713  | 94.0393         |                |                  | 169.0608       | 85.0340          | S    | 2081.9509 | 1041.4791       | 2064.9244      | 1032.9658        | 2063.9404      | 1032.4738        | 20 |
| 3  | 258.1084  | 129.5579        |                |                  | 240.0979       | 120.5526         | A    | 1994.9189 | 997.9631        | 1977.8924      | 989.4498         | 1976.9084      | 988.9578         | 19 |
| 4  | 355.1612  | 178.0842        |                |                  | 337.1506       | 169.0790         | P    | 1923.8818 | 962.4445        | 1906.8553      | 953.9313         | 1905.8712      | 953.4393         | 18 |
| 5  | 483.2198  | 242.1135        | 466.1932       | 233.6003         | 465.2092       | 233.1083         | Q    | 1826.8290 | 913.9182        | 1809.8025      | 905.4049         | 1808.8185      | 904.9129         | 17 |
| 6  | 570.2518  | 285.6295        | 553.2253       | 277.1163         | 552.2413       | 276.6243         | S    | 1698.7705 | 849.8889        | 1681.7439      | 841.3756         | 1680.7599      | 840.8836         | 16 |
| 7  | 685.2788  | 343.1430        | 668.2522       | 334.6297         | 667.2682       | 334.1377         | D    | 1611.7384 | 806.3729        | 1594.7119      | 797.8596         | 1593.7279      | 797.3676         | 15 |
| 8  | 814.3214  | 407.6643        | 797.2948       | 399.1510         | 796.3108       | 398.6590         | E    | 1496.7115 | 748.8594        | 1479.6849      | 740.3461         | 1478.7009      | 739.8541         | 14 |
| 9  | 871.3428  | 436.1750        | 854.3163       | 427.6618         | 853.3323       | 427.1698         | G    | 1367.6689 | 684.3381        | 1350.6424      | 675.8248         | 1349.6583      | 675.3328         | 13 |
| 10 | 940.3643  | 470.6858        | 923.3377       | 462.1725         | 922.3537       | 461.6805         | S    | 1310.6474 | 655.8274        | 1293.6209      | 647.3141         | 1292.6369      | 646.8221         | 12 |
| 11 | 1055.3912 | 528.1992        | 1038.3647      | 519.6860         | 1037.3807      | 519.1940         | D    | 1241.6260 | 621.3166        | 1224.5994      | 612.8034         | 1223.6154      | 612.3113         | 11 |
| 12 | 1168.4753 | 584.7413        | 1151.4487      | 576.2280         | 1150.4647      | 575.7360         | I    | 1126.5990 | 563.8032        | 1109.5725      | 555.2899         | 1108.5885      | 554.7979         | 10 |
| 13 | 1283.5022 | 642.2548        | 1266.4757      | 633.7415         | 1265.4917      | 633.2495         | D    | 1013.5150 | 507.2611        | 996.4884       | 498.7478         | 995.5044       | 498.2558         | 9  |
| 14 | 1370.5343 | 685.7708        | 1353.5077      | 677.2575         | 1352.5237      | 676.7655         | S    | 898.4880  | 449.7477        | 881.4615       | 441.2344         | 880.4775       | 440.7424         | 8  |
| 15 | 1499.5769 | 750.2921        | 1482.5503      | 741.7788         | 1481.5663      | 741.2868         | E    | 811.4560  | 406.2316        | 794.4294       | 397.7184         | 793.4454       | 397.2264         | 7  |
| 16 | 1596.6296 | 798.8184        | 1579.6031      | 790.3052         | 1578.6191      | 789.8132         | P    | 682.4134  | 341.7103        | 665.3869       | 333.1971         | 664.4028       | 332.7051         | 6  |
| 17 | 1711.6566 | 856.3319        | 1694.6300      | 847.8186         | 1693.6460      | 847.3266         | D    | 585.3606  | 293.1840        | 568.3341       | 284.6707         | 567.3501       | 284.1787         | 5  |
| 18 | 1824.7406 | 912.8739        | 1807.7141      | 904.3607         | 1806.7301      | 903.8687         | L    | 470.3337  | 235.6705        | 453.3071       | 227.1572         |                |                  | 4  |
| 19 | 1921.7934 | 961.4003        | 1904.7668      | 952.8871         | 1903.7828      | 952.3950         | P    | 357.2496  | 179.1285        | 340.2231       | 170.6152         |                |                  | 3  |
| 20 | 2034.8775 | 1017.9424       | 2017.8509      | 1009.4291        | 2016.8669      | 1008.9371        | L    | 260.1969  | 130.6021        | 243.1703       | 122.0888         |                |                  | 2  |
| 21 |           |                 |                |                  |                |                  | K    | 147.1128  | 74.0600         | 130.0863       | 65.5468          |                |                  | 1  |

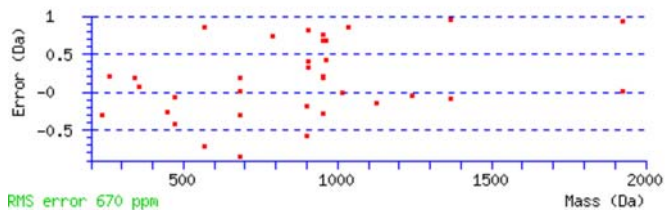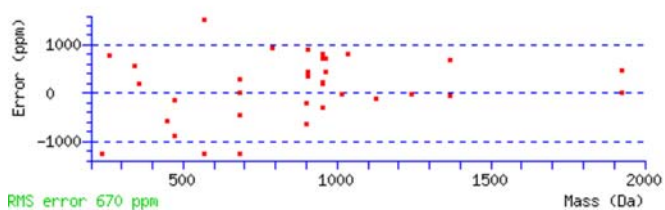

NCBI BLAST search of [ASAPQSDEGSDIDSEPDPLK](#)

(Parameters: blastp, nr protein database, expect=20000, no filter, PAM30)

Other BLAST [web gateways](#)

**All matches to this query**

| Score | Mr(calc): | Delta  | Sequence                              |
|-------|-----------|--------|---------------------------------------|
| 33.6  | 2277.9526 | 1.9796 | <a href="#">ASAPQSDEGSDIDSEPDPLK</a>  |
| 29.0  | 2277.9526 | 1.9796 | <a href="#">ASAPQSDEGSDIDSEPDPLK</a>  |
| 21.1  | 2277.9526 | 1.9796 | <a href="#">ASAPQSDEGSDIDSEPDPLK</a>  |
| 20.7  | 2278.9703 | 0.9619 | <a href="#">SPSQESSISLGGSSRSASFDR</a> |
| 20.6  | 2278.9735 | 0.9587 | <a href="#">FPNPFGLASATPATSTPMIR</a>  |
| 19.0  | 2278.9144 | 1.0178 | <a href="#">KASLQSGQEGPGDSPGSQFSK</a> |
| 18.6  | 2278.9486 | 0.9836 | <a href="#">EMTTKTPYLITPTATSK</a>     |
| 18.4  | 2277.9338 | 1.9984 | <a href="#">QQVSLESNSSMNSNTPLVR</a>   |
| 18.3  | 2278.8863 | 1.0459 | <a href="#">KVIEGMSDWAPSDMAMHK</a>    |
| 17.9  | 2277.9573 | 1.9749 | <a href="#">VQEEHMEVEQAQGPSLTSR</a>   |

**Mascot:** <http://www.matrixscience.com/>

# MASCOT SCIENCE Mascot Search Results

## Protein View

Match to: **IPI00625217** Score: **724**  
**Tax\_id=10090 Gene\_Symbol=Pax3 Paired box protein Pax-3**  
 Found in search of o63\_l1jan24\_09\_uc\_90min\_neuloss\_ms3\_pax3\_20ul.mgf

Nominal mass ( $M_r$ ): **53315**; Calculated pI value: **8.92**  
 NCBI BLAST search of [IPI00625217](#) against nr  
 Unformatted [sequence string](#) for pasting into other applications

Fixed modifications: Carbamidomethyl (C)  
 Variable modifications: Formyl (N-term), Oxidation (M), Phospho (ST)  
 Cleavage by Trypsin: cuts C-term side of KR unless next residue is P  
 Sequence Coverage: **38%**

Matched peptides shown in **Bold Red**

1 MTTLAGAVPR MMRPGGQNY PRSGFPLEVS TPLGQGRV**NO LGGVFINGRP**  
 51 **LPNHIRHKIV EMAHGGIRPC VISRQLRVSH** GCVSKILCRY **QETGSIRPGA**  
 101 **IGGSKPKQVT TPDVEKKIEE YKRENPGMFS WEIRDKLLKD** AVCDRNTVPS  
 151 **VSSISRILRS KFGGEEEEEA DLERKEAEE** EKKAKHSIDG **ILSERASAPQ**  
 201 **SDEGSDIDSE PDLPLKRKQR** **RSRTTFTAEO LEELEAFER** **THYPDIYTR**  
 251 ELAQRAKLTE **ARVQVWFSNR** RARWRKQAGA NQLMAFNHLI PGGFPPTAMP  
 301 TLPTYQLSET SYQPTSIPQA VSDPSSTVHR PQPLPPSTVH QSTIPSNADS  
 351 SSAYCLPSTR HGFSSYTDSE VPPSGPSNPM NPTIGNGLSP QVMGLLTNHG  
 401 GVPHQPTDY ALSPLTGGLE PTTTVSASCS QRLEHMKNVD SLPTSQPYCP  
 451 PTYSTAGYSM DPVTGYQYQG YGQSKPWF

Show predicted peptides also

Sort Peptides By  Residue Number  Increasing Mass  Decreasing Mass

| Start - End | Observed  | Mr (expt) | Mr (calc) | Delta   | Miss | Sequence                                                                                     |
|-------------|-----------|-----------|-----------|---------|------|----------------------------------------------------------------------------------------------|
| 38 - 56     | 701.0485  | 2100.1237 | 2100.1705 | -0.0467 | 0    | <b>R.VNQLGGVFINGRPLPNHIR.H</b> ( <a href="#">Ions score 44</a> )                             |
| 38 - 56     | 526.0518  | 2100.1782 | 2100.1705 | 0.0077  | 0    | <b>R.VNQLGGVFINGRPLPNHIR.H</b> ( <a href="#">Ions score 34</a> )                             |
| 38 - 56     | 701.0683  | 2100.1831 | 2100.1705 | 0.0126  | 0    | <b>R.VNQLGGVFINGRPLPNHIR.H</b> ( <a href="#">Ions score 55</a> )                             |
| 38 - 56     | 1051.1011 | 2100.1876 | 2100.1705 | 0.0171  | 0    | <b>R.VNQLGGVFINGRPLPNHIR.H</b> ( <a href="#">Ions score 16</a> )                             |
| 38 - 56     | 526.2977  | 2101.1616 | 2100.1705 | 0.9911  | 0    | <b>R.VNQLGGVFINGRPLPNHIR.H</b> ( <a href="#">Ions score 36</a> )                             |
| 38 - 56     | 701.3964  | 2101.1674 | 2100.1705 | 0.9970  | 0    | <b>R.VNQLGGVFINGRPLPNHIR.H</b> ( <a href="#">Ions score 56</a> )                             |
| 38 - 56     | 526.5427  | 2102.1416 | 2100.1705 | 1.9711  | 0    | <b>R.VNQLGGVFINGRPLPNHIR.H</b> ( <a href="#">Ions score 26</a> )                             |
| 38 - 56     | 710.4016  | 2128.1830 | 2128.1654 | 0.0176  | 0    | <b>R.VNQLGGVFINGRPLPNHIR.H</b> Formyl (N-term) ( <a href="#">Ions score 23</a> )             |
| 59 - 74     | 945.9937  | 1889.9729 | 1889.9716 | 0.0012  | 0    | <b>K.IVEMAHHGIRPCVISR.Q</b> Oxidation (M) ( <a href="#">Ions score 15</a> )                  |
| 59 - 74     | 630.9988  | 1889.9747 | 1889.9716 | 0.0031  | 0    | <b>K.IVEMAHHGIRPCVISR.Q</b> Oxidation (M) ( <a href="#">Ions score 23</a> )                  |
| 59 - 74     | 640.0025  | 1916.9857 | 1917.9666 | -0.9809 | 0    | <b>K.IVEMAHHGIRPCVISR.Q</b> Formyl (N-term); Oxidation (M) ( <a href="#">Ions score 23</a> ) |
| 90 - 107    | 462.2505  | 1844.9731 | 1844.9744 | -0.0014 | 0    | <b>R.YQETGSIRPGAIGGSKPK.Q</b> ( <a href="#">Ions score 24</a> )                              |
| 90 - 107    | 615.9984  | 1844.9734 | 1844.9744 | -0.0010 | 0    | <b>R.YQETGSIRPGAIGGSKPK.Q</b> ( <a href="#">Ions score 53</a> )                              |
| 90 - 107    | 923.4977  | 1844.9808 | 1844.9744 | 0.0064  | 0    | <b>R.YQETGSIRPGAIGGSKPK.Q</b> ( <a href="#">Ions score 41</a> )                              |
| 90 - 107    | 625.3336  | 1872.9790 | 1872.9694 | 0.0097  | 0    | <b>R.YQETGSIRPGAIGGSKPK.Q</b> Formyl (N-term) ( <a href="#">Ions score 24</a> )              |
| 108 - 116   | 1015.4998 | 1014.4925 | 1015.5186 | -1.0261 | 0    | <b>K.QVTTDPVEK.K</b> ( <a href="#">Ions score 24</a> )                                       |
| 108 - 116   | 508.7664  | 1015.5183 | 1015.5186 | -0.0003 | 0    | <b>K.QVTTDPVEK.K</b> ( <a href="#">Ions score 14</a> )                                       |
| 108 - 116   | 508.7667  | 1015.5188 | 1015.5186 | 0.0002  | 0    | <b>K.QVTTDPVEK.K</b> ( <a href="#">Ions score 20</a> )                                       |
| 108 - 116   | 1044.5264 | 1043.5191 | 1043.5135 | 0.0056  | 0    | <b>K.QVTTDPVEK.K</b> Formyl (N-term) ( <a href="#">Ions score 24</a> )                       |
| 108 - 117   | 572.8140  | 1143.6135 | 1143.6136 | -0.0001 | 1    | <b>K.QVTTDPVEK.K</b> ( <a href="#">Ions score 39</a> )                                       |
| 108 - 117   | 382.2119  | 1143.6138 | 1143.6136 | 0.0003  | 1    | <b>K.QVTTDPVEK.K</b> ( <a href="#">Ions score 36</a> )                                       |
| 117 - 122   | 405.2238  | 808.4331  | 808.4330  | 0.0001  | 1    | <b>K.IEEYK.R</b> ( <a href="#">Ions score 31</a> )                                           |
| 118 - 123   | 419.2268  | 836.4391  | 836.4392  | -0.0001 | 1    | <b>K.IEEYK.E</b> ( <a href="#">Ions score 31</a> )                                           |
| 118 - 123   | 837.4491  | 836.4418  | 836.4392  | 0.0026  | 1    | <b>K.IEEYK.E</b> ( <a href="#">Ions score 14</a> )                                           |
| 123 - 134   | 513.2481  | 1536.7225 | 1536.7143 | 0.0082  | 1    | <b>K.RENPGMFSWEIR.D</b> Oxidation (M) ( <a href="#">Ions score 63</a> )                      |
| 124 - 134   | 683.3176  | 1364.6206 | 1364.6183 | 0.0023  | 0    | <b>R.ENPGMFSWEIR.D</b> ( <a href="#">Ions score 43</a> )                                     |
| 124 - 134   | 691.3163  | 1380.6180 | 1380.6132 | 0.0048  | 0    | <b>R.ENPGMFSWEIR.D</b> Oxidation (M) ( <a href="#">Ions score 45</a> )                       |
| 124 - 134   | 691.3170  | 1380.6195 | 1380.6132 | 0.0063  | 0    | <b>R.ENPGMFSWEIR.D</b> Oxidation (M) ( <a href="#">Ions score 21</a> )                       |
| 124 - 134   | 1381.6305 | 1380.6232 | 1380.6132 | 0.0100  | 0    | <b>R.ENPGMFSWEIR.D</b> Oxidation (M) ( <a href="#">Ions score 26</a> )                       |
| 124 - 134   | 705.3135  | 1408.6124 | 1408.6081 | 0.0043  | 0    | <b>R.ENPGMFSWEIR.D</b> Formyl (N-term); Oxidation (M) ( <a href="#">Ions score 43</a> )      |
| 124 - 136   | 812.8759  | 1623.7372 | 1623.7351 | 0.0020  | 1    | <b>R.ENPGMFSWEIR.D</b> Oxidation (M) ( <a href="#">Ions score 43</a> )                       |
| 137 - 145   | 545.2886  | 1088.5626 | 1088.5648 | -0.0022 | 1    | <b>K.LLKDAVCDR.N</b> ( <a href="#">Ions score 48</a> )                                       |
| 146 - 156   | 573.8104  | 1145.6063 | 1145.6040 | 0.0022  | 0    | <b>R.NTVPSVSSISR.I</b> ( <a href="#">Ions score 36</a> )                                     |
| 146 - 156   | 1147.6035 | 1146.5962 | 1145.6040 | 0.9922  | 0    | <b>R.NTVPSVSSISR.I</b> ( <a href="#">Ions score 23</a> )                                     |
| 146 - 156   | 587.8076  | 1173.6007 | 1173.5990 | 0.0017  | 0    | <b>R.NTVPSVSSISR.I</b> Formyl (N-term) ( <a href="#">Ions score 32</a> )                     |
| 146 - 156   | 587.8085  | 1173.6025 | 1173.5990 | 0.0035  | 0    | <b>R.NTVPSVSSISR.I</b> Formyl (N-term) ( <a href="#">Ions score 40</a> )                     |
| 146 - 156   | 1174.6113 | 1173.6041 | 1173.5990 | 0.0051  | 0    | <b>R.NTVPSVSSISR.I</b> Formyl (N-term) ( <a href="#">Ions score 12</a> )                     |
| 146 - 156   | 526.9125  | 1577.7156 | 1573.4306 | 4.2850  | 0    | <b>R.NTVPSVSSISR.I</b> Formyl (N-term); 5 Phospho (ST) ( <a href="#">Ions score 38</a> )     |
| 160 - 164   | 572.2136  | 571.2063  | 565.3224  | 5.8839  | 1    | <b>R.SKFGK.G</b> ( <a href="#">Ions score 6</a> )                                            |
| 162 - 174   | 754.2815  | 1506.5484 | 1507.6790 | -1.1306 | 1    | <b>K.FGKGEEEEADLER.K</b> ( <a href="#">Ions score 19</a> )                                   |
| 162 - 174   | 503.5661  | 1507.6766 | 1507.6790 | -0.0025 | 1    | <b>K.FGKGEEEEADLER.K</b> ( <a href="#">Ions score 59</a> )                                   |
| 162 - 174   | 503.5668  | 1507.6785 | 1507.6790 | -0.0005 | 1    | <b>K.FGKGEEEEADLER.K</b> ( <a href="#">Ions score 38</a> )                                   |
| 162 - 174   | 754.8476  | 1507.6806 | 1507.6790 | 0.0016  | 1    | <b>K.FGKGEEEEADLER.K</b> ( <a href="#">Ions score 81</a> )                                   |

|           |           |           |           |         |   |                            |                                   |                                   |
|-----------|-----------|-----------|-----------|---------|---|----------------------------|-----------------------------------|-----------------------------------|
| 162 - 174 | 768.8466  | 1535.6787 | 1535.6740 | 0.0047  | 1 | K.FKGEEEEADLER.K           | Formyl (N-term)                   | ( <a href="#">Ions score 61</a> ) |
| 165 - 174 | 588.7541  | 1175.4936 | 1175.4942 | -0.0006 | 0 | K.GEEEEADLER.K             | ( <a href="#">Ions score 16</a> ) |                                   |
| 165 - 174 | 588.7548  | 1175.4951 | 1175.4942 | 0.0009  | 0 | K.GEEEEADLER.K             | ( <a href="#">Ions score 63</a> ) |                                   |
| 165 - 174 | 588.7551  | 1175.4956 | 1175.4942 | 0.0014  | 0 | K.GEEEEADLER.K             | ( <a href="#">Ions score 59</a> ) |                                   |
| 165 - 174 | 1176.5059 | 1175.4986 | 1175.4942 | 0.0044  | 0 | K.GEEEEADLER.K             | ( <a href="#">Ions score 46</a> ) |                                   |
| 165 - 174 | 602.7515  | 1203.4884 | 1203.4891 | -0.0007 | 0 | K.GEEEEADLER.K             | Formyl (N-term)                   | ( <a href="#">Ions score 36</a> ) |
| 165 - 175 | 435.5363  | 1303.5869 | 1303.5891 | -0.0022 | 1 | K.GEEEEADLERK.E            | ( <a href="#">Ions score 38</a> ) |                                   |
| 165 - 175 | 652.8019  | 1303.5892 | 1303.5891 | 0.0001  | 1 | K.GEEEEADLERK.E            | ( <a href="#">Ions score 39</a> ) |                                   |
| 165 - 175 | 652.8030  | 1303.5915 | 1303.5891 | 0.0024  | 1 | K.GEEEEADLERK.E            | ( <a href="#">Ions score 50</a> ) |                                   |
| 165 - 175 | 666.8007  | 1331.5869 | 1331.5841 | 0.0028  | 1 | K.GEEEEADLERK.E            | Formyl (N-term)                   | ( <a href="#">Ions score 51</a> ) |
| 184 - 195 | 663.3626  | 1324.7107 | 1324.7099 | 0.0008  | 1 | K.AKHSIDGILSER.A           | ( <a href="#">Ions score 28</a> ) |                                   |
| 184 - 195 | 663.3635  | 1324.7125 | 1324.7099 | 0.0026  | 1 | K.AKHSIDGILSER.A           | ( <a href="#">Ions score 48</a> ) |                                   |
| 186 - 195 | 563.7959  | 1125.5772 | 1125.5778 | -0.0006 | 0 | K.HSIDGILSER.A             | ( <a href="#">Ions score 54</a> ) |                                   |
| 186 - 195 | 563.7968  | 1125.5791 | 1125.5778 | 0.0013  | 0 | K.HSIDGILSER.A             | ( <a href="#">Ions score 60</a> ) |                                   |
| 186 - 195 | 1126.5876 | 1125.5804 | 1125.5778 | 0.0026  | 0 | K.HSIDGILSER.A             | ( <a href="#">Ions score 40</a> ) |                                   |
| 186 - 195 | 563.8016  | 1125.5887 | 1125.5778 | 0.0109  | 0 | K.HSIDGILSER.A             | ( <a href="#">Ions score 33</a> ) |                                   |
| 186 - 195 | 564.2772  | 1126.5399 | 1125.5778 | 0.9621  | 0 | K.HSIDGILSER.A             | ( <a href="#">Ions score 13</a> ) |                                   |
| 186 - 195 | 577.3014  | 1152.5882 | 1153.5727 | -0.9845 | 0 | K.HSIDGILSER.A             | Formyl (N-term)                   | ( <a href="#">Ions score 31</a> ) |
| 186 - 195 | 577.7946  | 1153.5746 | 1153.5727 | 0.0018  | 0 | K.HSIDGILSER.A             | Formyl (N-term)                   | ( <a href="#">Ions score 16</a> ) |
| 186 - 195 | 1154.5898 | 1153.5826 | 1153.5727 | 0.0098  | 0 | K.HSIDGILSER.A             | Formyl (N-term)                   | ( <a href="#">Ions score 18</a> ) |
| 196 - 216 | 1085.4990 | 2169.9835 | 2169.9913 | -1.0078 | 0 | R.ASAPQSDEGSDIDSEPDPLK.R   | ( <a href="#">Ions score 40</a> ) |                                   |
| 196 - 216 | 724.3375  | 2169.9907 | 2169.9913 | -0.0006 | 0 | R.ASAPQSDEGSDIDSEPDPLK.R   | ( <a href="#">Ions score 80</a> ) |                                   |
| 196 - 216 | 1086.0042 | 2169.9937 | 2169.9913 | 0.0024  | 0 | R.ASAPQSDEGSDIDSEPDPLK.R   | ( <a href="#">Ions score 96</a> ) |                                   |
| 196 - 216 | 1086.0087 | 2170.0028 | 2169.9913 | 0.0114  | 0 | R.ASAPQSDEGSDIDSEPDPLK.R   | ( <a href="#">Ions score 69</a> ) |                                   |
| 196 - 216 | 1100.0023 | 2197.9901 | 2197.9863 | 0.0038  | 0 | R.ASAPQSDEGSDIDSEPDPLK.R   | Formyl (N-term)                   | ( <a href="#">Ions score 31</a> ) |
| 196 - 216 | 733.6710  | 2197.9912 | 2197.9863 | 0.0050  | 0 | R.ASAPQSDEGSDIDSEPDPLK.R   | Formyl (N-term)                   | ( <a href="#">Ions score 31</a> ) |
| 196 - 216 | 1100.0057 | 2197.9969 | 2197.9863 | 0.0107  | 0 | R.ASAPQSDEGSDIDSEPDPLK.R   | Formyl (N-term)                   | ( <a href="#">Ions score 31</a> ) |
| 196 - 216 | 750.6761  | 2249.0064 | 2249.9577 | -0.9512 | 0 | R.ASAPQSDEGSDIDSEPDPLK.R   | Phospho (ST)                      | ( <a href="#">Ions score 31</a> ) |
| 196 - 216 | 760.9847  | 2279.9322 | 2277.9526 | 1.9796  | 0 | R.ASAPQSDEGSDIDSEPDPLK.R   | Formyl (N-term); Phospho          | ( <a href="#">Ions score 31</a> ) |
| 196 - 217 | 1163.5406 | 2325.0667 | 2326.0924 | -1.0257 | 1 | R.ASAPQSDEGSDIDSEPDPLK.R.K | ( <a href="#">Ions score 58</a> ) |                                   |
| 196 - 217 | 776.0298  | 2325.0675 | 2326.0924 | -1.0249 | 1 | R.ASAPQSDEGSDIDSEPDPLK.R.K | ( <a href="#">Ions score 34</a> ) |                                   |
| 196 - 217 | 1164.0549 | 2326.0953 | 2326.0924 | 0.0029  | 1 | R.ASAPQSDEGSDIDSEPDPLK.R.K | ( <a href="#">Ions score 70</a> ) |                                   |
| 196 - 217 | 776.3733  | 2326.0980 | 2326.0924 | 0.0056  | 1 | R.ASAPQSDEGSDIDSEPDPLK.R.K | ( <a href="#">Ions score 72</a> ) |                                   |
| 196 - 217 | 776.3734  | 2326.0984 | 2326.0924 | 0.0060  | 1 | R.ASAPQSDEGSDIDSEPDPLK.R.K | ( <a href="#">Ions score 94</a> ) |                                   |
| 196 - 217 | 785.7041  | 2354.0905 | 2354.0874 | 0.0031  | 1 | R.ASAPQSDEGSDIDSEPDPLK.R.K | Formyl (N-term)                   | ( <a href="#">Ions score 34</a> ) |
| 196 - 217 | 1178.0544 | 2354.0943 | 2354.0874 | 0.0070  | 1 | R.ASAPQSDEGSDIDSEPDPLK.R.K | Formyl (N-term)                   | ( <a href="#">Ions score 34</a> ) |
| 196 - 217 | 785.7065  | 2354.0978 | 2354.0874 | 0.0104  | 1 | R.ASAPQSDEGSDIDSEPDPLK.R.K | Formyl (N-term)                   | ( <a href="#">Ions score 34</a> ) |
| 222 - 236 | 603.9714  | 1808.8925 | 1808.8904 | 0.0021  | 1 | R.SRTTFTAQLEELER.A         | ( <a href="#">Ions score 48</a> ) |                                   |
| 224 - 236 | 1566.7635 | 1565.7563 | 1565.7573 | -0.0010 | 0 | R.TTFTAQLEELER.A           | ( <a href="#">Ions score 21</a> ) |                                   |
| 224 - 236 | 783.8881  | 1565.7617 | 1565.7573 | 0.0044  | 0 | R.TTFTAQLEELER.A           | ( <a href="#">Ions score 74</a> ) |                                   |
| 224 - 236 | 783.8886  | 1565.7625 | 1565.7573 | 0.0053  | 0 | R.TTFTAQLEELER.A           | ( <a href="#">Ions score 65</a> ) |                                   |
| 224 - 236 | 783.8904  | 1565.7662 | 1565.7573 | 0.0089  | 0 | R.TTFTAQLEELER.A           | ( <a href="#">Ions score 47</a> ) |                                   |
| 224 - 236 | 783.8922  | 1565.7697 | 1565.7573 | 0.0125  | 0 | R.TTFTAQLEELER.A           | ( <a href="#">Ions score 45</a> ) |                                   |
| 224 - 236 | 796.8979  | 1591.7813 | 1593.7522 | -1.9709 | 0 | R.TTFTAQLEELER.A           | Formyl (N-term)                   | ( <a href="#">Ions score 34</a> ) |
| 224 - 236 | 797.8843  | 1593.7541 | 1593.7522 | 0.0019  | 0 | R.TTFTAQLEELER.A           | Formyl (N-term)                   | ( <a href="#">Ions score 41</a> ) |
| 224 - 236 | 797.8857  | 1593.7569 | 1593.7522 | 0.0047  | 0 | R.TTFTAQLEELER.A           | Formyl (N-term)                   | ( <a href="#">Ions score 70</a> ) |
| 224 - 236 | 797.8894  | 1593.7643 | 1593.7522 | 0.0120  | 0 | R.TTFTAQLEELER.A           | Formyl (N-term)                   | ( <a href="#">Ions score 35</a> ) |
| 224 - 236 | 825.3876  | 1648.7606 | 1645.7236 | 3.0370  | 0 | R.TTFTAQLEELER.A           | Phospho (ST)                      | ( <a href="#">Ions score 38</a> ) |
| 241 - 249 | 389.1922  | 1164.5548 | 1164.5564 | -0.0016 | 0 | R.THYPDYTR.E               | ( <a href="#">Ions score 30</a> ) |                                   |
| 241 - 249 | 583.2853  | 1164.5560 | 1164.5564 | -0.0004 | 0 | R.THYPDYTR.E               | ( <a href="#">Ions score 26</a> ) |                                   |
| 241 - 249 | 583.2869  | 1164.5592 | 1164.5564 | 0.0028  | 0 | R.THYPDYTR.E               | ( <a href="#">Ions score 12</a> ) |                                   |
| 241 - 249 | 1165.5692 | 1164.5619 | 1164.5564 | 0.0056  | 0 | R.THYPDYTR.E               | ( <a href="#">Ions score 19</a> ) |                                   |
| 241 - 249 | 597.2846  | 1192.5547 | 1192.5513 | 0.0034  | 0 | R.THYPDYTR.E               | Formyl (N-term)                   | ( <a href="#">Ions score 13</a> ) |
| 263 - 270 | 518.2729  | 1034.5312 | 1034.5298 | 0.0015  | 0 | R.VQVWFSNR.R               | ( <a href="#">Ions score 29</a> ) |                                   |

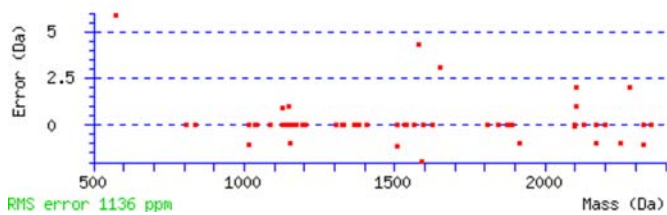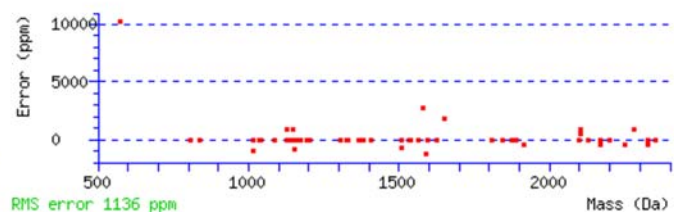

ID IPI00625217.1 IPI; PRT; 479 AA.  
 AC IPI00625217;  
 DT 30-JUL-2005 (IPI Mouse rel. 3.09, Created)  
 DT 30-JUL-2005 (IPI Mouse rel. 3.09, Last sequence update)  
 DE PAIRED BOX PROTEIN PAX-3.  
 OS Mus musculus (Mouse).  
 OC Eukaryota; Metazoa; Chordata; Craniata; Vertebrata; Euteleostomi;  
 OC Mammalia; Eutheria; Rodentia; Sciurognathi; Muridae; Murinae; Mus.  
 OX NCBI\_TaxID=10090;  
 CC -!- GENE\_LOCATION: Chr. 1:78097842-78193711:-1.  
 DR UniProtKB/Swiss-Prot; P24610; PAX3\_MOUSE; M.  
 DR REFSEQ\_VALIDATED; NP\_032807; GI:226958472; -.  
 DR ENSEMBL; ENSMUSP00000084320; ENSMUSG00000004872; -.  
 DR UniParc; UPI00000E891C; -; -.  
 DR MGI; MGI:97487; Pax3; -.

**MATRIX SCIENCE Mascot Search Results**

**Peptide View**

MS/MS Fragmentation of **ASAPQSDEGSDIDSEPDLPK**

Found in **IP100625217**, Tax\_Id=10090 Gene\_Symbol=Pax3 Paired box protein Pax-3

Match to Query 7456: 2279.932212 from(760.984680,3+) intensity(169254.0000) index(2551)

Title: o63\_11jan24\_09\_uc\_90min\_neuloss\_ms3\_pax3\_20ul.03846.03846.3

Data file o63\_11jan24\_09\_uc\_90min\_neuloss\_ms3\_pax3\_20ul.mgf

Click mouse within plot area to zoom in by factor of two about that point

Or, Plot from 200 to 2000 Da Full range

Label all possible matches  Label matches used for scoring



Monoisotopic mass of neutral peptide Mr(calc): 2277.9526

Fixed modifications: Carbamidomethyl (C) (apply to specified residues or termini only)

Variable modifications:

N-term : Formyl (N-term)

S10 : Phospho (ST), with neutral losses 97.9769(shown in table), 0.0000

Ions Score: 34 Expect: 1.3

Matches : 34/342 fragment ions using 52 most intense peaks (help)

| #  | b         | b <sup>++</sup> | b <sup>*</sup> | b <sup>*++</sup> | b <sup>0</sup> | b <sup>0++</sup> | Seq. | y         | y <sup>++</sup> | y <sup>*</sup> | y <sup>*++</sup> | y <sup>0</sup> | y <sup>0++</sup> | #  |
|----|-----------|-----------------|----------------|------------------|----------------|------------------|------|-----------|-----------------|----------------|------------------|----------------|------------------|----|
| 1  | 100.0393  | 50.5233         |                |                  |                |                  | A    |           |                 |                |                  |                |                  | 21 |
| 2  | 187.0713  | 94.0393         |                |                  | 169.0608       | 85.0340          | S    | 2081.9509 | 1041.4791       | 2064.9244      | 1032.9658        | 2063.9404      | 1032.4738        | 20 |
| 3  | 258.1084  | 129.5579        |                |                  | 240.0979       | 120.5526         | A    | 1994.9189 | 997.9631        | 1977.8924      | 989.4498         | 1976.9084      | 988.9578         | 19 |
| 4  | 355.1612  | 178.0842        |                |                  | 337.1506       | 169.0790         | P    | 1923.8818 | 962.4445        | 1906.8553      | 953.9313         | 1905.8712      | 953.4393         | 18 |
| 5  | 483.2198  | 242.1135        | 466.1932       | 233.6003         | 465.2092       | 233.1083         | Q    | 1826.8290 | 913.9182        | 1809.8025      | 905.4049         | 1808.8185      | 904.9129         | 17 |
| 6  | 570.2518  | 285.6295        | 553.2253       | 277.1163         | 552.2413       | 276.6243         | S    | 1698.7705 | 849.8889        | 1681.7439      | 841.3756         | 1680.7599      | 840.8836         | 16 |
| 7  | 685.2788  | 343.1430        | 668.2522       | 334.6297         | 667.2682       | 334.1377         | D    | 1611.7384 | 806.3729        | 1594.7119      | 797.8596         | 1593.7279      | 797.3676         | 15 |
| 8  | 814.3214  | 407.6643        | 797.2948       | 399.1510         | 796.3108       | 398.6590         | E    | 1496.7115 | 748.8594        | 1479.6849      | 740.3461         | 1478.7009      | 739.8541         | 14 |
| 9  | 871.3428  | 436.1750        | 854.3163       | 427.6618         | 853.3323       | 427.1698         | G    | 1367.6689 | 684.3381        | 1350.6424      | 675.8248         | 1349.6583      | 675.3328         | 13 |
| 10 | 940.3643  | 470.6858        | 923.3377       | 462.1725         | 922.3537       | 461.6805         | S    | 1310.6474 | 655.8274        | 1293.6209      | 647.3141         | 1292.6369      | 646.8221         | 12 |
| 11 | 1055.3912 | 528.1992        | 1038.3647      | 519.6860         | 1037.3807      | 519.1940         | D    | 1241.6260 | 621.3166        | 1224.5994      | 612.8034         | 1223.6154      | 612.3113         | 11 |
| 12 | 1168.4753 | 584.7413        | 1151.4487      | 576.2280         | 1150.4647      | 575.7360         | I    | 1126.5990 | 563.8032        | 1109.5725      | 555.2899         | 1108.5885      | 554.7979         | 10 |
| 13 | 1283.5022 | 642.2548        | 1266.4757      | 633.7415         | 1265.4917      | 633.2495         | D    | 1013.5150 | 507.2611        | 996.4884       | 498.7478         | 995.5044       | 498.2558         | 9  |
| 14 | 1370.5343 | 685.7708        | 1353.5077      | 677.2575         | 1352.5237      | 676.7655         | S    | 898.4880  | 449.7477        | 881.4615       | 441.2344         | 880.4775       | 440.7424         | 8  |
| 15 | 1499.5769 | 750.2921        | 1482.5503      | 741.7788         | 1481.5663      | 741.2868         | E    | 811.4560  | 406.2316        | 794.4294       | 397.7184         | 793.4454       | 397.2264         | 7  |
| 16 | 1596.6296 | 798.8184        | 1579.6031      | 790.3052         | 1578.6191      | 789.8132         | P    | 682.4134  | 341.7103        | 665.3869       | 333.1971         | 664.4028       | 332.7051         | 6  |
| 17 | 1711.6566 | 856.3319        | 1694.6300      | 847.8186         | 1693.6460      | 847.3266         | D    | 585.3606  | 293.1840        | 568.3341       | 284.6707         | 567.3501       | 284.1787         | 5  |
| 18 | 1824.7406 | 912.8739        | 1807.7141      | 904.3607         | 1806.7301      | 903.8687         | L    | 470.3337  | 235.6705        | 453.3071       | 227.1572         |                |                  | 4  |
| 19 | 1921.7934 | 961.4003        | 1904.7668      | 952.8871         | 1903.7828      | 952.3950         | P    | 357.2496  | 179.1285        | 340.2231       | 170.6152         |                |                  | 3  |
| 20 | 2034.8775 | 1017.9424       | 2017.8509      | 1009.4291        | 2016.8669      | 1008.9371        | L    | 260.1969  | 130.6021        | 243.1703       | 122.0888         |                |                  | 2  |
| 21 |           |                 |                |                  |                |                  | K    | 147.1128  | 74.0600         | 130.0863       | 65.5468          |                |                  | 1  |



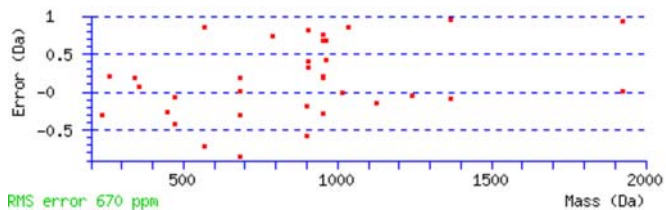

NCBI BLAST search of [ASAPQSDEGSDIDSEPDPLK](#)

(Parameters: blastp, nr protein database, expect=20000, no filter, PAM30)

Other BLAST [web gateways](#)

**All matches to this query**

| Score | Mr(calc): | Delta   | Sequence                                  |
|-------|-----------|---------|-------------------------------------------|
| 36.5  | 2276.8948 | 3.0374  | <a href="#">LSTLGSGGESGGDGSPGGAGATAAR</a> |
| 35.8  | 2276.8948 | 3.0374  | <a href="#">LSTLGSGGESGGDGSPGGAGATAAR</a> |
| 35.8  | 2276.8948 | 3.0374  | <a href="#">LSTLGSGGESGGDGSPGGAGATAAR</a> |
| 33.6  | 2277.9526 | 1.9796  | <a href="#">ASAPQSDEGSDIDSEPDPLK</a>      |
| 32.0  | 2282.8941 | -2.9619 | <a href="#">HGGLDLTTNNSSTTSSTTSK</a>      |
| 31.8  | 2276.8948 | 3.0374  | <a href="#">LSTLGSGGESGGDGSPGGAGATAAR</a> |
| 31.8  | 2276.8948 | 3.0374  | <a href="#">LSTLGSGGESGGDGSPGGAGATAAR</a> |
| 29.2  | 2281.6964 | -1.7642 | <a href="#">NSTPNSSGGGGGGSGGNDQLSK</a>    |
| 29.1  | 2276.8948 | 3.0374  | <a href="#">LSTLGSGGESGGDGSPGGAGATAAR</a> |
| 29.0  | 2277.9526 | 1.9796  | <a href="#">ASAPQSDEGSDIDSEPDPLK</a>      |

Mascot: <http://www.matrixscience.com/>

# MASCOT SCIENCE Mascot Search Results

## Peptide View

MS/MS Fragmentation of **ASAPQSDEGSDIDSEPDLPK**

Found in **IP100407505**, Tax\_Id=10090 Gene\_Symbol=Pax3 Putative uncharacterized protein

Match to Query 7421: 2249.006430 from(750.676086,3+) intensity(107526.0000) index(2533)

Title: o63\_11jan24\_09\_uc\_90min\_neuloss\_ms3\_pax3\_20ul.03823.03823.3

Data file o63\_11jan24\_09\_uc\_90min\_neuloss\_ms3\_pax3\_20ul.mgf

Click mouse within plot area to zoom in by factor of two about that point

Or, Plot from 200 to 1900 Da Full range

Label all possible matches Label matches used for scoring

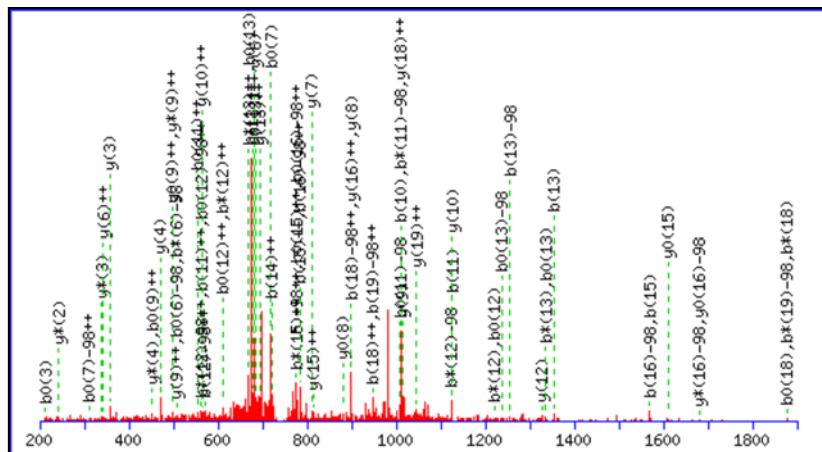

Monoisotopic mass of neutral peptide Mr(calc): 2249.9577

Fixed modifications: Carbamidomethyl (C) (apply to specified residues or termini only)

Variable modifications:

S6 : Phospho (ST), with neutral losses 0.0000(shown in table), 97.9769

Ions Score: 19 Expect: 1.5

Matches : 69/342 fragment ions using 117 most intense peaks ([help](#))

| #  | b         | b <sup>++</sup> | b*        | b <sup>*++</sup> | b <sup>0</sup> | b <sup>0++</sup> | Seq. | y         | y <sup>++</sup> | y*        | y <sup>*++</sup> | y <sup>0</sup> | y <sup>0++</sup> | #  |
|----|-----------|-----------------|-----------|------------------|----------------|------------------|------|-----------|-----------------|-----------|------------------|----------------|------------------|----|
| 1  | 72.0444   | 36.5258         |           |                  |                |                  | A    |           |                 |           |                  |                |                  | 21 |
| 2  | 159.0764  | 80.0418         |           |                  | 141.0659       | 71.0366          | S    | 2179.9278 | 1090.4676       | 2162.9013 | 1081.9543        | 2161.9173      | 1081.4623        | 20 |
| 3  | 230.1135  | 115.5604        |           |                  | 212.1030       | 106.5551         | A    | 2092.8958 | 1046.9515       | 2075.8693 | 1038.4383        | 2074.8853      | 1037.9463        | 19 |
| 4  | 327.1663  | 164.0868        |           |                  | 309.1557       | 155.0815         | P    | 2021.8587 | 1011.4330       | 2004.8322 | 1002.9197        | 2003.8481      | 1002.4277        | 18 |
| 5  | 455.2249  | 228.1161        | 438.1983  | 219.6028         | 437.2143       | 219.1108         | Q    | 1924.8059 | 962.9066        | 1907.7794 | 954.3933         | 1906.7954      | 953.9013         | 17 |
| 6  | 622.2232  | 311.6153        | 605.1967  | 303.1020         | 604.2127       | 302.6100         | S    | 1796.7474 | 898.8773        | 1779.7208 | 890.3640         | 1778.7368      | 889.8720         | 16 |
| 7  | 737.2502  | 369.1287        | 720.2236  | 360.6155         | 719.2396       | 360.1234         | D    | 1629.7490 | 815.3781        | 1612.7225 | 806.8649         | 1611.7384      | 806.3729         | 15 |
| 8  | 866.2928  | 433.6500        | 849.2662  | 425.1367         | 848.2822       | 424.6447         | E    | 1514.7221 | 757.8647        | 1497.6955 | 749.3514         | 1496.7115      | 748.8594         | 14 |
| 9  | 923.3142  | 462.1608        | 906.2877  | 453.6475         | 905.3037       | 453.1555         | G    | 1385.6795 | 693.3434        | 1368.6529 | 684.8301         | 1367.6689      | 684.3381         | 13 |
| 10 | 1010.3463 | 505.6768        | 993.3197  | 497.1635         | 992.3357       | 496.6715         | S    | 1328.6580 | 664.8326        | 1311.6315 | 656.3194         | 1310.6474      | 655.8274         | 12 |
| 11 | 1125.3732 | 563.1902        | 1108.3467 | 554.6770         | 1107.3626      | 554.1850         | D    | 1241.6260 | 621.3166        | 1224.5994 | 612.8034         | 1223.6154      | 612.3113         | 11 |
| 12 | 1238.4573 | 619.7323        | 1221.4307 | 611.2190         | 1220.4467      | 610.7270         | I    | 1126.5990 | 563.8032        | 1109.5725 | 555.2899         | 1108.5885      | 554.7979         | 10 |
| 13 | 1353.4842 | 677.2457        | 1336.4577 | 668.7325         | 1335.4736      | 668.2405         | D    | 1013.5150 | 507.2611        | 996.4884  | 498.7478         | 995.5044       | 498.2558         | 9  |
| 14 | 1440.5162 | 720.7618        | 1423.4897 | 712.2485         | 1422.5057      | 711.7565         | S    | 898.4880  | 449.7477        | 881.4615  | 441.2344         | 880.4775       | 440.7424         | 8  |
| 15 | 1569.5588 | 785.2831        | 1552.5323 | 776.7698         | 1551.5483      | 776.2778         | E    | 811.4560  | 406.2316        | 794.4294  | 397.7184         | 793.4454       | 397.2264         | 7  |
| 16 | 1666.6116 | 833.8094        | 1649.5850 | 825.2962         | 1648.6010      | 824.8042         | P    | 682.4134  | 341.7103        | 665.3869  | 333.1971         | 664.4028       | 332.7051         | 6  |
| 17 | 1781.6385 | 891.3229        | 1764.6120 | 882.8096         | 1763.6280      | 882.3176         | D    | 585.3606  | 293.1840        | 568.3341  | 284.6707         | 567.3501       | 284.1787         | 5  |
| 18 | 1894.7226 | 947.8649        | 1877.6961 | 939.3517         | 1876.7120      | 938.8597         | L    | 470.3337  | 235.6705        | 453.3071  | 227.1572         |                |                  | 4  |
| 19 | 1991.7754 | 996.3913        | 1974.7488 | 987.8780         | 1973.7648      | 987.3860         | P    | 357.2496  | 179.1285        | 340.2231  | 170.6152         |                |                  | 3  |
| 20 | 2104.8594 | 1052.9334       | 2087.8329 | 1044.4201        | 2086.8489      | 1043.9281        | L    | 260.1969  | 130.6021        | 243.1703  | 122.0888         |                |                  | 2  |
| 21 |           |                 |           |                  |                |                  | K    | 147.1128  | 74.0600         | 130.0863  | 65.5468          |                |                  | 1  |

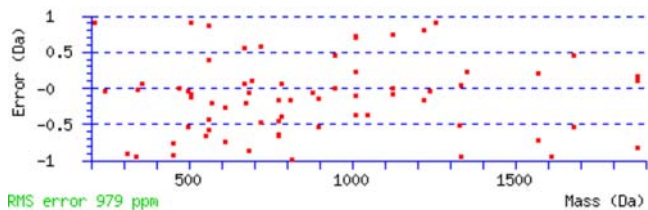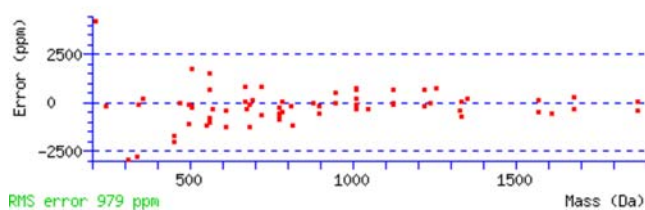

NCBI BLAST search of [ASAPQSDEGSDIDSEPDPLK](#)

(Parameters: blastp, nr protein database, expect=20000, no filter, PAM30)

Other BLAST [web gateways](#)

**All matches to this query**

| Score | Mr(calc): | Delta   | Sequence                                 |
|-------|-----------|---------|------------------------------------------|
| 22.0  | 2248.9192 | 0.0873  | <a href="#">GSDGQPGPPGPPGTAGFPGSPGAK</a> |
| 21.8  | 2249.0270 | -0.0205 | <a href="#">LVDVDKLSLPQDTGVFTSK</a>      |
| 21.7  | 2243.0327 | 5.9737  | <a href="#">MNGSLGTKLLLCVSAGSANDK</a>    |
| 21.5  | 2249.9577 | -0.9512 | <a href="#">ASAPQSDEGSDIDSEPDPLK</a>     |
| 20.4  | 2246.0596 | 2.9468  | <a href="#">SGGTEGLLAEKLEALITQTR</a>     |
| 19.2  | 2249.9577 | -0.9512 | <a href="#">ASAPQSDEGSDIDSEPDPLK</a>     |
| 18.9  | 2249.0270 | -0.0205 | <a href="#">LVDVDKLSLPQDTGVFTSK</a>      |
| 18.6  | 2249.9341 | -0.9277 | <a href="#">SSKASLGSLEGEVEAEASSPK</a>    |
| 18.6  | 2249.9341 | -0.9277 | <a href="#">SSKASLGSLEGEVEAEASSPK</a>    |
| 18.6  | 2249.0270 | -0.0205 | <a href="#">LVDVDKLSLPQDTGVFTSK</a>      |

Mascot: <http://www.matrixscience.com/>

# MASCOT SCIENCE Mascot Search Results

## Peptide View

MS/MS Fragmentation of **ASAPQSDGSDIDSEPDLPK**

Found in **IPI00407505**, Tax\_Id=10090 Gene\_Symbol=Pax3 Putative uncharacterized protein

Match to Query 7262: 2151.994726 from(1077.004639,2+) intensity(92464.2000) index(2825)

Title: o63\_11jan24\_09\_uc\_90min\_neuloss\_ms3\_pax3\_20ul.04186.04186.2

Data file o63\_11jan24\_09\_uc\_90min\_neuloss\_ms3\_pax3\_20ul.mgf

Click mouse within plot area to zoom in by factor of two about that point

Or, Plot from 300 to 2000 Da Full range

Label all possible matches Label matches used for scoring

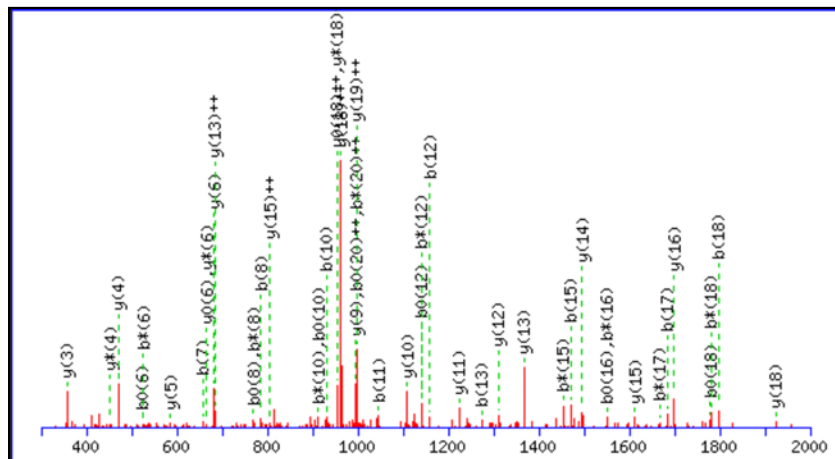

Monoisotopic mass of neutral peptide Mr(calc): 2151.9808

Fixed modifications: Carbamidomethyl (C) (apply to specified residues or termini only)

Variable modifications:

S14 : Dehydrated (S)

Ions Score: 80 Expect: 1.3e-005

Matches : 47/222 fragment ions using 78 most intense peaks ([help](#))

| #  | b         | b <sup>++</sup> | b*        | b <sup>*++</sup> | b <sup>0</sup> | b <sup>0++</sup> | Seq. | y         | y <sup>++</sup> | y*        | y <sup>*++</sup> | y <sup>0</sup> | y <sup>0++</sup> | #  |
|----|-----------|-----------------|-----------|------------------|----------------|------------------|------|-----------|-----------------|-----------|------------------|----------------|------------------|----|
| 1  | 72.0444   | 36.5258         |           |                  |                |                  | A    |           |                 |           |                  |                |                  | 21 |
| 2  | 159.0764  | 80.0418         |           |                  | 141.0659       | 71.0366          | S    | 2081.9509 | 1041.4791       | 2064.9244 | 1032.9658        | 2063.9404      | 1032.4738        | 20 |
| 3  | 230.1135  | 115.5604        |           |                  | 212.1030       | 106.5551         | A    | 1994.9189 | 997.9631        | 1977.8924 | 989.4498         | 1976.9084      | 988.9578         | 19 |
| 4  | 327.1663  | 164.0868        |           |                  | 309.1557       | 155.0815         | P    | 1923.8818 | 962.4445        | 1906.8553 | 953.9313         | 1905.8712      | 953.4393         | 18 |
| 5  | 455.2249  | 228.1161        | 438.1983  | 219.6028         | 437.2143       | 219.1108         | Q    | 1826.8290 | 913.9182        | 1809.8025 | 905.4049         | 1808.8185      | 904.9129         | 17 |
| 6  | 542.2569  | 271.6321        | 525.2304  | 263.1188         | 524.2463       | 262.6268         | S    | 1698.7705 | 849.8889        | 1681.7439 | 841.3756         | 1680.7599      | 840.8836         | 16 |
| 7  | 657.2838  | 329.1456        | 640.2573  | 320.6323         | 639.2733       | 320.1403         | D    | 1611.7384 | 806.3729        | 1594.7119 | 797.8596         | 1593.7279      | 797.3676         | 15 |
| 8  | 786.3264  | 393.6669        | 769.2999  | 385.1536         | 768.3159       | 384.6616         | E    | 1496.7115 | 748.8594        | 1479.6849 | 740.3461         | 1478.7009      | 739.8541         | 14 |
| 9  | 843.3479  | 422.1776        | 826.3214  | 413.6643         | 825.3373       | 413.1723         | G    | 1367.6689 | 684.3381        | 1350.6424 | 675.8248         | 1349.6583      | 675.3328         | 13 |
| 10 | 930.3799  | 465.6936        | 913.3534  | 457.1803         | 912.3694       | 456.6883         | S    | 1310.6474 | 655.8274        | 1293.6209 | 647.3141         | 1292.6369      | 646.8221         | 12 |
| 11 | 1045.4069 | 523.2071        | 1028.3803 | 514.6938         | 1027.3963      | 514.2018         | D    | 1223.6154 | 612.3113        | 1206.5889 | 603.7981         | 1205.6048      | 603.3061         | 11 |
| 12 | 1158.4909 | 579.7491        | 1141.4644 | 571.2358         | 1140.4804      | 570.7438         | I    | 1108.5885 | 554.7979        | 1091.5619 | 546.2846         | 1090.5779      | 545.7926         | 10 |
| 13 | 1273.5179 | 637.2626        | 1256.4913 | 628.7493         | 1255.5073      | 628.2573         | D    | 995.5044  | 498.2558        | 978.4779  | 489.7426         | 977.4938       | 489.2506         | 9  |
| 14 | 1342.5393 | 671.7733        | 1325.5128 | 663.2600         | 1324.5288      | 662.7680         | S    | 880.4775  | 440.7424        | 863.4509  | 432.2291         | 862.4669       | 431.7371         | 8  |
| 15 | 1471.5819 | 736.2946        | 1454.5554 | 727.7813         | 1453.5714      | 727.2893         | E    | 811.4560  | 406.2316        | 794.4294  | 397.7184         | 793.4454       | 397.2264         | 7  |
| 16 | 1568.6347 | 784.8210        | 1551.6082 | 776.3077         | 1550.6241      | 775.8157         | P    | 682.4134  | 341.7103        | 665.3869  | 333.1971         | 664.4028       | 332.7051         | 6  |
| 17 | 1683.6616 | 842.3345        | 1666.6351 | 833.8212         | 1665.6511      | 833.3292         | D    | 585.3606  | 293.1840        | 568.3341  | 284.6707         | 567.3501       | 284.1787         | 5  |
| 18 | 1796.7457 | 898.8765        | 1779.7192 | 890.3632         | 1778.7351      | 889.8712         | L    | 470.3337  | 235.6705        | 453.3071  | 227.1572         |                |                  | 4  |
| 19 | 1893.7985 | 947.4029        | 1876.7719 | 938.8896         | 1875.7879      | 938.3976         | P    | 357.2496  | 179.1285        | 340.2231  | 170.6152         |                |                  | 3  |
| 20 | 2006.8825 | 1003.9449       | 1989.8560 | 995.4316         | 1988.8720      | 994.9396         | L    | 260.1969  | 130.6021        | 243.1703  | 122.0888         |                |                  | 2  |

|    |  |  |  |  |  |  |          |          |         |          |         |  |  |          |
|----|--|--|--|--|--|--|----------|----------|---------|----------|---------|--|--|----------|
| 21 |  |  |  |  |  |  | <b>K</b> | 147.1128 | 74.0600 | 130.0863 | 65.5468 |  |  | <b>1</b> |
|----|--|--|--|--|--|--|----------|----------|---------|----------|---------|--|--|----------|

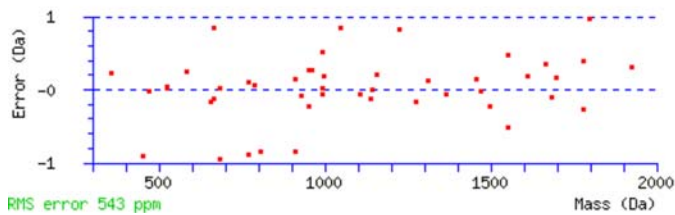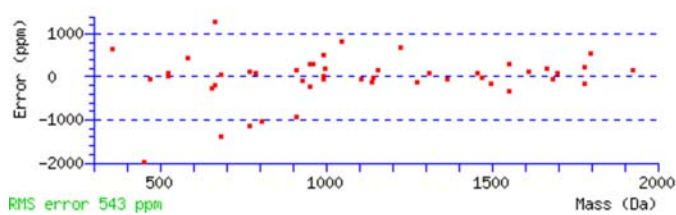

NCBI **BLAST** search of [ASAPQSDEGSDIDSEPDLPK](#)  
 (Parameters: blastp, nr protein database, expect=20000, no filter, PAM30)  
 Other BLAST [web gateways](#)

**All matches to this query**

| Score | Mr(calc): | Delta   | Sequence                                |
|-------|-----------|---------|-----------------------------------------|
| 79.6  | 2151.9808 | 0.0139  | <a href="#">ASAPQSDEGSDIDSEPDLPK</a>    |
| 59.0  | 2151.9808 | 0.0139  | <a href="#">ASAPQSDEGSDIDSEPDLPK</a>    |
| 40.0  | 2151.9808 | 0.0139  | <a href="#">ASAPQSDEGSDIDSEPDLPK</a>    |
| 29.7  | 2151.9808 | 0.0139  | <a href="#">ASAPQSDEGSDIDSEPDLPK</a>    |
| 26.4  | 2152.0220 | -0.0272 | <a href="#">SCESGAAGTVSGTSLAAPDITVR</a> |
| 22.1  | 2150.0061 | 1.9886  | <a href="#">VQENLLASGVDLVITYTR</a>      |
| 22.0  | 2152.0220 | -0.0272 | <a href="#">SCESGAAGTVSGTSLAAPDITVR</a> |
| 22.0  | 2152.0220 | -0.0272 | <a href="#">SCESGAAGTVSGTSLAAPDITVR</a> |
| 20.9  | 2151.0292 | 0.9655  | <a href="#">LLGTVMATALMPKQATVMR</a>     |
| 19.9  | 2149.9827 | 2.0120  | <a href="#">VQPQTQMTAPKQTQTPDR</a>      |

**Mascot:** <http://www.matrixscience.com/>

**MATRIX SCIENCE Mascot Search Results**

**Peptide View**

MS/MS Fragmentation of **ASAPQSDEGSDIDSEPDLPK**

Found in **IP100407505**, Tax\_Id=10090 Gene\_Symbol=Pax3 Putative uncharacterized protein

Match to Query 7293: 2181.992772 from(1092.003662,2+) intensity(143534.0000) index(2576)

Title: o63\_11jan24\_09\_uc\_90min\_neuloss\_ms3\_pax3\_20ul.03879.03879.2

Data file o63\_11jan24\_09\_uc\_90min\_neuloss\_ms3\_pax3\_20ul.mgf

Click mouse within plot area to zoom in by factor of two about that point

Or, Plot from 300 to 2000 Da Full range

Label all possible matches Label matches used for scoring

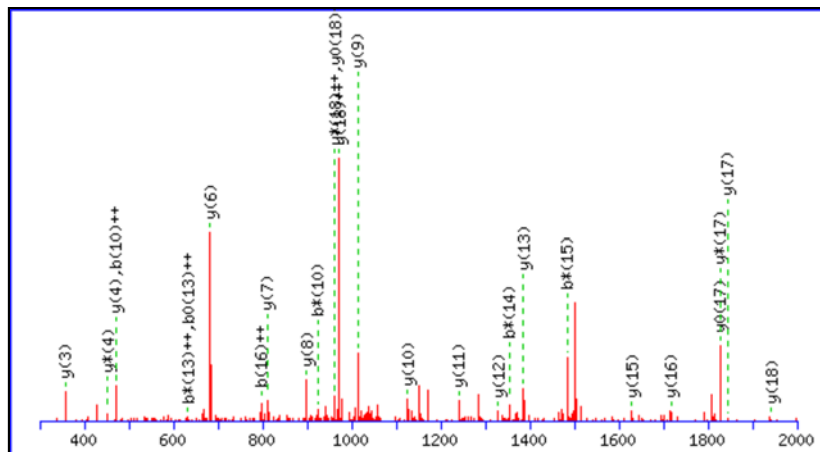

Monoisotopic mass of neutral peptide Mr(calc): 2179.9757

Fixed modifications: Carbamidomethyl (C) (apply to specified residues or termini only)

Variable modifications:

N-term : Formyl (N-term)

S2 : Dehydrated (S)

Ions Score: 77 Expect: 2e-005

Matches : 27/222 fragment ions using 51 most intense peaks (help)

| #  | b         | b <sup>++</sup> | b*        | b <sup>*++</sup> | b <sup>0</sup> | b <sup>0++</sup> | Seq. | y         | y <sup>++</sup> | y*        | y <sup>*++</sup> | y <sup>0</sup> | y <sup>0++</sup> | #  |
|----|-----------|-----------------|-----------|------------------|----------------|------------------|------|-----------|-----------------|-----------|------------------|----------------|------------------|----|
| 1  | 100.0393  | 50.5233         |           |                  |                |                  | A    |           |                 |           |                  |                |                  | 21 |
| 2  | 169.0608  | 85.0340         |           |                  | 151.0502       | 76.0287          | S    | 2081.9509 | 1041.4791       | 2064.9244 | 1032.9658        | 2063.9404      | 1032.4738        | 20 |
| 3  | 240.0979  | 120.5526        |           |                  | 222.0873       | 111.5473         | A    | 2012.9295 | 1006.9684       | 1995.9029 | 998.4551         | 1994.9189      | 997.9631         | 19 |
| 4  | 337.1506  | 169.0790        |           |                  | 319.1401       | 160.0737         | P    | 1941.8924 | 971.4498        | 1924.8658 | 962.9365         | 1923.8818      | 962.4445         | 18 |
| 5  | 465.2092  | 233.1083        | 448.1827  | 224.5950         | 447.1987       | 224.1030         | Q    | 1844.8396 | 922.9234        | 1827.8131 | 914.4102         | 1826.8290      | 913.9182         | 17 |
| 6  | 552.2413  | 276.6243        | 535.2147  | 268.1110         | 534.2307       | 267.6190         | S    | 1716.7810 | 858.8942        | 1699.7545 | 850.3809         | 1698.7705      | 849.8889         | 16 |
| 7  | 667.2682  | 334.1377        | 650.2416  | 325.6245         | 649.2576       | 325.1325         | D    | 1629.7490 | 815.3781        | 1612.7225 | 806.8649         | 1611.7384      | 806.3729         | 15 |
| 8  | 796.3108  | 398.6590        | 779.2842  | 390.1458         | 778.3002       | 389.6537         | E    | 1514.7221 | 757.8647        | 1497.6955 | 749.3514         | 1496.7115      | 748.8594         | 14 |
| 9  | 853.3323  | 427.1698        | 836.3057  | 418.6565         | 835.3217       | 418.1645         | G    | 1385.6795 | 693.3434        | 1368.6529 | 684.8301         | 1367.6689      | 684.3381         | 13 |
| 10 | 940.3643  | 470.6858        | 923.3377  | 462.1725         | 922.3537       | 461.6805         | S    | 1328.6580 | 664.8326        | 1311.6315 | 656.3194         | 1310.6474      | 655.8274         | 12 |
| 11 | 1055.3912 | 528.1992        | 1038.3647 | 519.6860         | 1037.3807      | 519.1940         | D    | 1241.6260 | 621.3166        | 1224.5994 | 612.8034         | 1223.6154      | 612.3113         | 11 |
| 12 | 1168.4753 | 584.7413        | 1151.4487 | 576.2280         | 1150.4647      | 575.7360         | I    | 1126.5990 | 563.8032        | 1109.5725 | 555.2899         | 1108.5885      | 554.7979         | 10 |
| 13 | 1283.5022 | 642.2548        | 1266.4757 | 633.7415         | 1265.4917      | 633.2495         | D    | 1013.5150 | 507.2611        | 996.4884  | 498.7478         | 995.5044       | 498.2558         | 9  |
| 14 | 1370.5343 | 685.7708        | 1353.5077 | 677.2575         | 1352.5237      | 676.7655         | S    | 898.4880  | 449.7477        | 881.4615  | 441.2344         | 880.4775       | 440.7424         | 8  |
| 15 | 1499.5769 | 750.2921        | 1482.5503 | 741.7788         | 1481.5663      | 741.2868         | E    | 811.4560  | 406.2316        | 794.4294  | 397.7184         | 793.4454       | 397.2264         | 7  |
| 16 | 1596.6296 | 798.8184        | 1579.6031 | 790.3052         | 1578.6191      | 789.8132         | P    | 682.4134  | 341.7103        | 665.3869  | 333.1971         | 664.4028       | 332.7051         | 6  |
| 17 | 1711.6566 | 856.3319        | 1694.6300 | 847.8186         | 1693.6460      | 847.3266         | D    | 585.3606  | 293.1840        | 568.3341  | 284.6707         | 567.3501       | 284.1787         | 5  |
| 18 | 1824.7406 | 912.8739        | 1807.7141 | 904.3607         | 1806.7301      | 903.8687         | L    | 470.3337  | 235.6705        | 453.3071  | 227.1572         |                |                  | 4  |
| 19 | 1921.7934 | 961.4003        | 1904.7668 | 952.8871         | 1903.7828      | 952.3950         | P    | 357.2496  | 179.1285        | 340.2231  | 170.6152         |                |                  | 3  |
| 20 | 2034.8775 | 1017.9424       | 2017.8509 | 1009.4291        | 2016.8669      | 1008.9371        | L    | 260.1969  | 130.6021        | 243.1703  | 122.0888         |                |                  | 2  |
| 21 |           |                 |           |                  |                |                  | K    | 147.1128  | 74.0600         | 130.0863  | 65.5468          |                |                  | 1  |

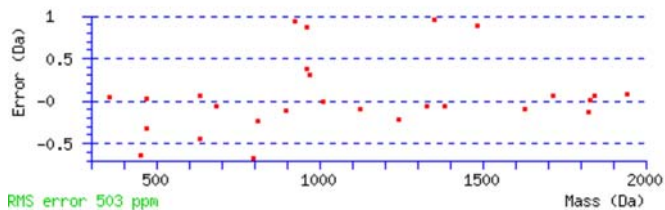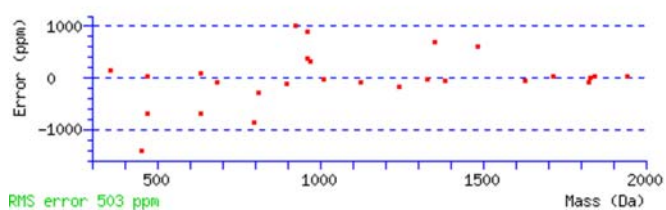

NCBI BLAST search of [ASAPQSDEGS](#)[DIDSEPDLPLK](#)

(Parameters: blastp, nr protein database, expect=20000, no filter, PAM30)

Other BLAST [web gateways](#)

**All matches to this query**

| Score | Mr(calc): | Delta   | Sequence                                               |
|-------|-----------|---------|--------------------------------------------------------|
| 77.3  | 2179.9757 | 2.0171  | <a href="#">ASAPQSDEGS</a> <a href="#">DIDSEPDLPLK</a> |
| 52.4  | 2179.9757 | 2.0171  | <a href="#">ASAPQSDEGS</a> <a href="#">DIDSEPDLPLK</a> |
| 32.1  | 2179.9757 | 2.0171  | <a href="#">ASAPQSDEGS</a> <a href="#">DIDSEPDLPLK</a> |
| 26.2  | 2182.0163 | -0.0236 | <a href="#">VTQNLPMKEGCTEVSLLR</a>                     |
| 26.0  | 2180.9661 | 1.0267  | <a href="#">QSLNSPSPGETEMDLLVTR</a>                    |
| 23.4  | 2182.0018 | -0.0090 | <a href="#">IFSCDSTLLASSASLQTTVK</a>                   |
| 23.1  | 2180.0224 | 1.9704  | <a href="#">WTNAKMEIATEEPLNPIK</a>                     |
| 22.8  | 2182.0018 | -0.0090 | <a href="#">IFSCDSTLLASSASLQTTVK</a>                   |
| 22.8  | 2180.9674 | 1.0253  | <a href="#">QMQSGVSGFRDLNTEAHVK</a>                    |
| 22.8  | 2180.9674 | 1.0253  | <a href="#">QMQSGVSGFRDLNTEAHVK</a>                    |

Mascot: <http://www.matrixscience.com/>

**MASCOT SCIENCE Mascot Search Results**

**Peptide View**

MS/MS Fragmentation of **ASAPQSDEGSDIDSEPDLPK**

Found in **IP100625217**, Tax\_Id=10090 Gene\_Symbol=Pax3 Paired box protein Pax-3

Match to Query 7421: 2249.006430 from(750.676086,3+) intensity(107526.0000) index(2533)

Title: o63\_11jan24\_09\_uc\_90min\_neuloss\_ms3\_pax3\_20ul.03823.03823.3

Data file o63\_11jan24\_09\_uc\_90min\_neuloss\_ms3\_pax3\_20ul.mgf

Click mouse within plot area to zoom in by factor of two about that point

Or, Plot from 200 to 1900 Da Full range

Label all possible matches Label matches used for scoring

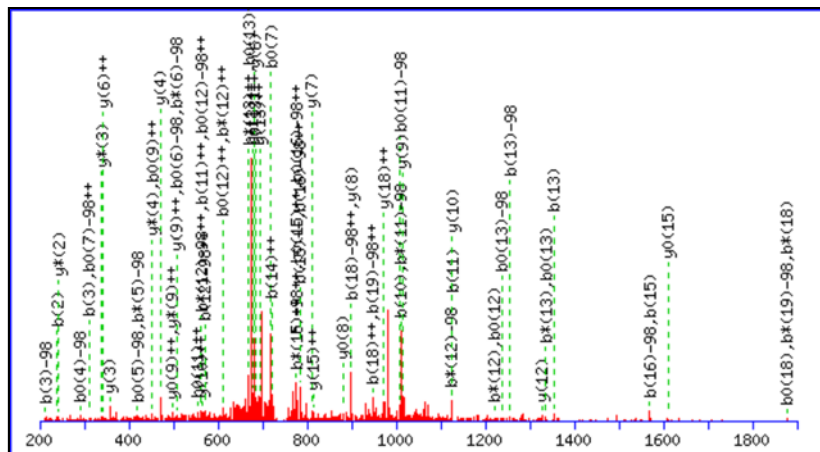

Monoisotopic mass of neutral peptide Mr(calc): 2249.9577

Fixed modifications: Carbamidomethyl (C) (apply to specified residues or termini only)

Variable modifications:

S2 : Phospho (ST), with neutral losses 0.0000(shown in table), 97.9769

Ions Score: 22 Expect: 0.89

Matches : 70/336 fragment ions using 117 most intense peaks (help)

| #  | b                | b <sup>++</sup> | b*               | b <sup>*++</sup> | b <sup>0</sup>   | b <sup>0++</sup> | Seq. | y                | y <sup>++</sup> | y*              | y <sup>*++</sup> | y <sup>0</sup>   | y <sup>0++</sup> | #  |
|----|------------------|-----------------|------------------|------------------|------------------|------------------|------|------------------|-----------------|-----------------|------------------|------------------|------------------|----|
| 1  | 72.0444          | 36.5258         |                  |                  |                  |                  | A    |                  |                 |                 |                  |                  |                  | 21 |
| 2  | <b>239.0427</b>  | 120.0250        |                  |                  | 221.0322         | 111.0197         | S    | 2179.9278        | 1090.4676       | 2162.9013       | 1081.9543        | 2161.9173        | 1081.4623        | 20 |
| 3  | <b>310.0799</b>  | 155.5436        |                  |                  | 292.0693         | 146.5383         | A    | 2012.9295        | 1006.9684       | 1995.9029       | 998.4551         | 1994.9189        | 997.9631         | 19 |
| 4  | 407.1326         | 204.0700        |                  |                  | 389.1221         | 195.0647         | P    | 1941.8924        | <b>971.4498</b> | 1924.8658       | 962.9365         | 1923.8818        | 962.4445         | 18 |
| 5  | 535.1912         | 268.0992        | 518.1647         | 259.5860         | 517.1806         | 259.0940         | Q    | 1844.8396        | 922.9234        | 1827.8131       | 914.4102         | 1826.8290        | 913.9182         | 17 |
| 6  | 622.2232         | 311.6153        | 605.1967         | 303.1020         | 604.2127         | 302.6100         | S    | 1716.7810        | 858.8942        | 1699.7545       | 850.3809         | 1698.7705        | 849.8889         | 16 |
| 7  | 737.2502         | 369.1287        | 720.2236         | 360.6155         | <b>719.2396</b>  | 360.1234         | D    | 1629.7490        | <b>815.3781</b> | 1612.7225       | 806.8649         | <b>1611.7384</b> | 806.3729         | 15 |
| 8  | 866.2928         | 433.6500        | 849.2662         | 425.1367         | 848.2822         | 424.6447         | E    | 1514.7221        | 757.8647        | 1497.6955       | 749.3514         | 1496.7115        | 748.8594         | 14 |
| 9  | 923.3142         | 462.1608        | 906.2877         | 453.6475         | 905.3037         | <b>453.1555</b>  | G    | 1385.6795        | <b>693.3434</b> | 1368.6529       | 684.8301         | 1367.6689        | <b>684.3381</b>  | 13 |
| 10 | <b>1010.3463</b> | 505.6768        | 993.3197         | 497.1635         | 992.3357         | 496.6715         | S    | <b>1328.6580</b> | 664.8326        | 1311.6315       | 656.3194         | 1310.6474        | 655.8274         | 12 |
| 11 | <b>1125.3732</b> | <b>563.1902</b> | 1108.3467        | 554.6770         | 1107.3626        | <b>554.1850</b>  | D    | 1241.6260        | 621.3166        | 1224.5994       | 612.8034         | 1223.6154        | 612.3113         | 11 |
| 12 | 1238.4573        | 619.7323        | <b>1221.4307</b> | <b>611.2190</b>  | <b>1220.4467</b> | <b>610.7270</b>  | I    | <b>1126.5990</b> | <b>563.8032</b> | 1109.5725       | 555.2899         | 1108.5885        | 554.7979         | 10 |
| 13 | <b>1353.4842</b> | <b>677.2457</b> | <b>1336.4577</b> | <b>668.7325</b>  | <b>1335.4736</b> | <b>668.2405</b>  | D    | <b>1013.5150</b> | <b>507.2611</b> | 996.4884        | <b>498.7478</b>  | 995.5044         | <b>498.2558</b>  | 9  |
| 14 | 1440.5162        | <b>720.7618</b> | 1423.4897        | 712.2485         | 1422.5057        | 711.7565         | S    | <b>898.4880</b>  | 449.7477        | 881.4615        | 441.2344         | <b>880.4775</b>  | 440.7424         | 8  |
| 15 | <b>1569.5588</b> | <b>785.2831</b> | 1552.5323        | <b>776.7698</b>  | 1551.5483        | <b>776.2778</b>  | E    | <b>811.4560</b>  | 406.2316        | 794.4294        | 397.7184         | 793.4454         | 397.2264         | 7  |
| 16 | 1666.6116        | 833.8094        | 1649.5850        | 825.2962         | 1648.6010        | 824.8042         | P    | <b>682.4134</b>  | <b>341.7103</b> | 665.3869        | 333.1971         | 664.4028         | 332.7051         | 6  |
| 17 | 1781.6385        | 891.3229        | 1764.6120        | 882.8096         | 1763.6280        | 882.3176         | D    | 585.3606         | 293.1840        | 568.3341        | 284.6707         | 567.3501         | 284.1787         | 5  |
| 18 | 1894.7226        | <b>947.8649</b> | <b>1877.6961</b> | 939.3517         | <b>1876.7120</b> | 938.8597         | L    | <b>470.3337</b>  | 235.6705        | <b>453.3071</b> | 227.1572         |                  |                  | 4  |
| 19 | 1991.7754        | 996.3913        | 1974.7488        | 987.8780         | 1973.7648        | 987.3860         | P    | <b>357.2496</b>  | 179.1285        | <b>340.2231</b> | 170.6152         |                  |                  | 3  |
| 20 | 2104.8594        | 1052.9334       | 2087.8329        | 1044.4201        | 2086.8489        | 1043.9281        | L    | 260.1969         | 130.6021        | <b>243.1703</b> | 122.0888         |                  |                  | 2  |
| 21 |                  |                 |                  |                  |                  |                  | K    | 147.1128         | 74.0600         | 130.0863        | 65.5468          |                  |                  | 1  |



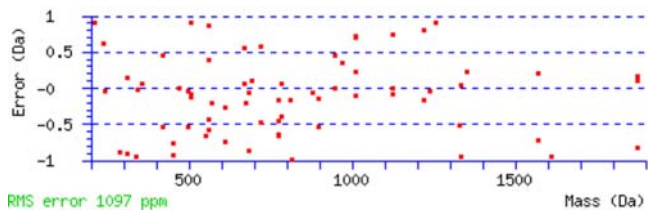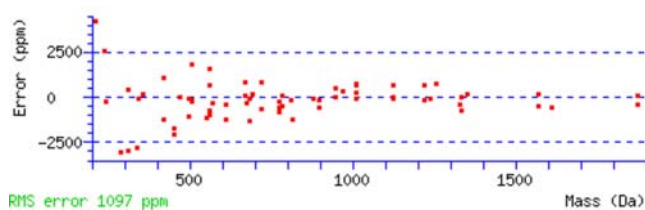

NCBI BLAST search of [ASAPQSDEGSDIDSEPDPLK](#)

(Parameters: blastp, nr protein database, expect=20000, no filter, PAM30)

Other BLAST [web gateways](#)

**All matches to this query**

| Score | Mr(calc): | Delta   | Sequence                                 |
|-------|-----------|---------|------------------------------------------|
| 22.0  | 2248.9192 | 0.0873  | <a href="#">GSDGQPGPPGPPGTAGFPGSPGAK</a> |
| 21.8  | 2249.0270 | -0.0205 | <a href="#">LVDVDKLSLPQDTGVFTSK</a>      |
| 21.7  | 2243.0327 | 5.9737  | <a href="#">MNGSLGTKLLLCVSAGSANDK</a>    |
| 21.5  | 2249.9577 | -0.9512 | <a href="#">ASAPQSDEGSDIDSEPDPLK</a>     |
| 20.4  | 2246.0596 | 2.9468  | <a href="#">SGGTEGLLAEKLEALITQTR</a>     |
| 19.2  | 2249.9577 | -0.9512 | <a href="#">ASAPQSDEGSDIDSEPDPLK</a>     |
| 18.9  | 2249.0270 | -0.0205 | <a href="#">LVDVDKLSLPQDTGVFTSK</a>      |
| 18.6  | 2249.9341 | -0.9277 | <a href="#">SSKASLGSLEGEVEAEASSPK</a>    |
| 18.6  | 2249.9341 | -0.9277 | <a href="#">SSKASLGSLEGEVEAEASSPK</a>    |
| 18.6  | 2249.0270 | -0.0205 | <a href="#">LVDVDKLSLPQDTGVFTSK</a>      |

Mascot: <http://www.matrixscience.com/>

DR Entrez Gene; 18505; Pax3; -.  
 DR UniGene; Mm.1371; -; -.  
 DR UniGene; Mm.478746; -; -.  
 DR CCDS; CCDS15082.1; -; -.  
 DR trome; MTR044593; -; PRT.  
 DR Transfac; T00680; -; -.  
 DR CleanEx; MM\_PAX3; -; -.  
 DR InterPro; IPR001356; Homeobox.  
 DR InterPro; IPR017970; Homeobox\_CS.  
 DR InterPro; IPR009057; Homeodomain-like.  
 DR InterPro; IPR012287; Homeodomain-rel.  
 DR InterPro; IPR001523; Paired\_box\_N.  
 DR InterPro; IPR022106; Pax7.  
 DR InterPro; IPR011991; WHTH\_trsnscrt\_rep\_DNA-bd.  
 DR Pfam; PF00046; Homeobox; 1.  
 DR Pfam; PF00292; PAX; 1.  
 DR Pfam; PF12360; Pax7; 1.  
 DR PRINTS; PR00027; PAIREDBOX.  
 DR SMART; SM00389; HOX; 1.  
 DR SMART; SM00351; PAX; 1.  
 DR PROSITE; PS00027; HOMEBOX\_1; 1.  
 DR PROSITE; PS50071; HOMEBOX\_2; 1.  
 DR PROSITE; PS00034; PAIRED\_1; 1.  
 DR PROSITE; PS51057; PAIRED\_2; 1.  
 DR SUPERFAMILY; SSF46689; Homeodomain\_like; 2.  
 DR GENE3D; G3DSA:1.10.10.10; Wing\_hlx\_DNA\_bd; 2.  
 DR GENE3D; G3DSA:1.10.10.60; Homeodomain-rel; 1.  
 SQ SEQUENCE 479 AA; 52949 MW; 8806E551FFB755A0 CRC64;  
 MTTLAGAVPR MMRPGPGQNY PRSGFPLEVS TPLGQGRVNQ LGGVFINGRP LPNHIRHKIV  
 EMAHHGIRPC VISRQLRVSH GCVSKILCRY QETGSIRPGA IGGSKPKQVT TPDVEKKIEE  
 YKRENPGMFS WEIRDKLLKD AVCDRNTVPS VSSISRILRS KFGKGEEEEE DLERKEAEES  
 EKKAKHSIDG ILSERASAPQ SDEGSDIDSE PDLPLKRKQR RSRTTFTAEQ LEELEAFER  
 THYPDIYTRE ELAQRAKLTE ARVQVWFSNR RARWRKQAGA NQLMAFNHLI PGGFPPTAMP  
 TLPTYQLSET SYQPTSIPQA VSDPSSTVHR PQPLPPSTVH QSTIPSNADS SSAYCLPSTR  
 HGFSSYTDSF VPPSGPSNPM NPTIGNGLSP QVMGLLTNHG GVPHPQPTDY ALSPLTGGLE  
 PTTTVSASCS QRLEHMKNV D SLPTSQPYCP PITYSTAGYSM DPVTGYQYQG YGQSKPWTF

Mascot: <http://www.matrixscience.com/>
